# Supplementary material for: Formal [3 + 2] Cycloaddition of α-Imino Esters with Azo Compounds: Facile Construction of Pentasubstituted 1,2,4-Triazoline Skeletons
Source: MDPI journal article supplement (doi:10.3390/molecules28114339), 2023-05-25
Supplement: s1 [file s1]

<sup>1</sup>H, <sup>13</sup>C, and <sup>19</sup>F-NMR spectra and HPLC charts.

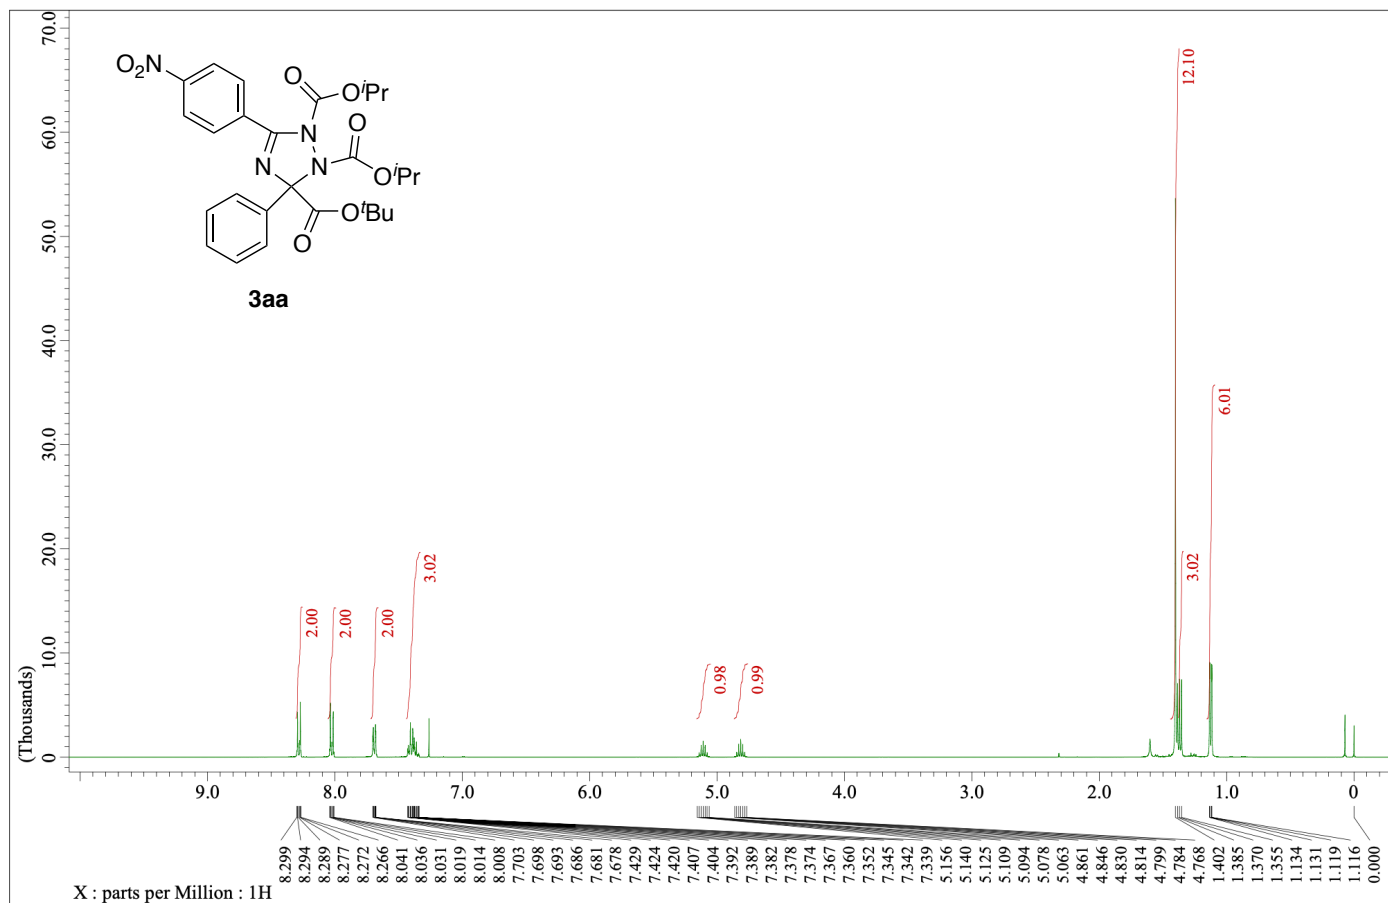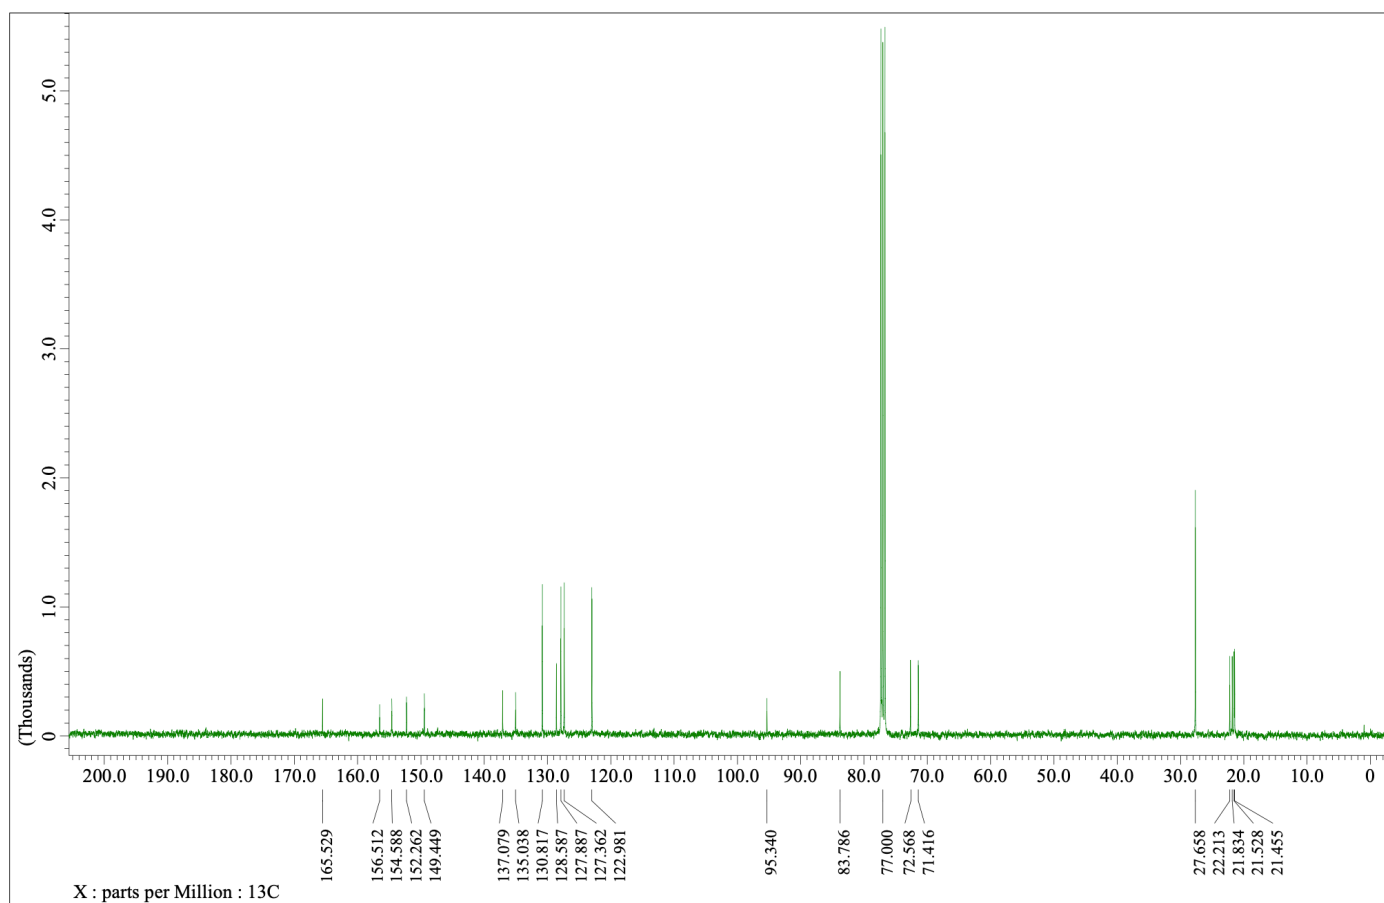

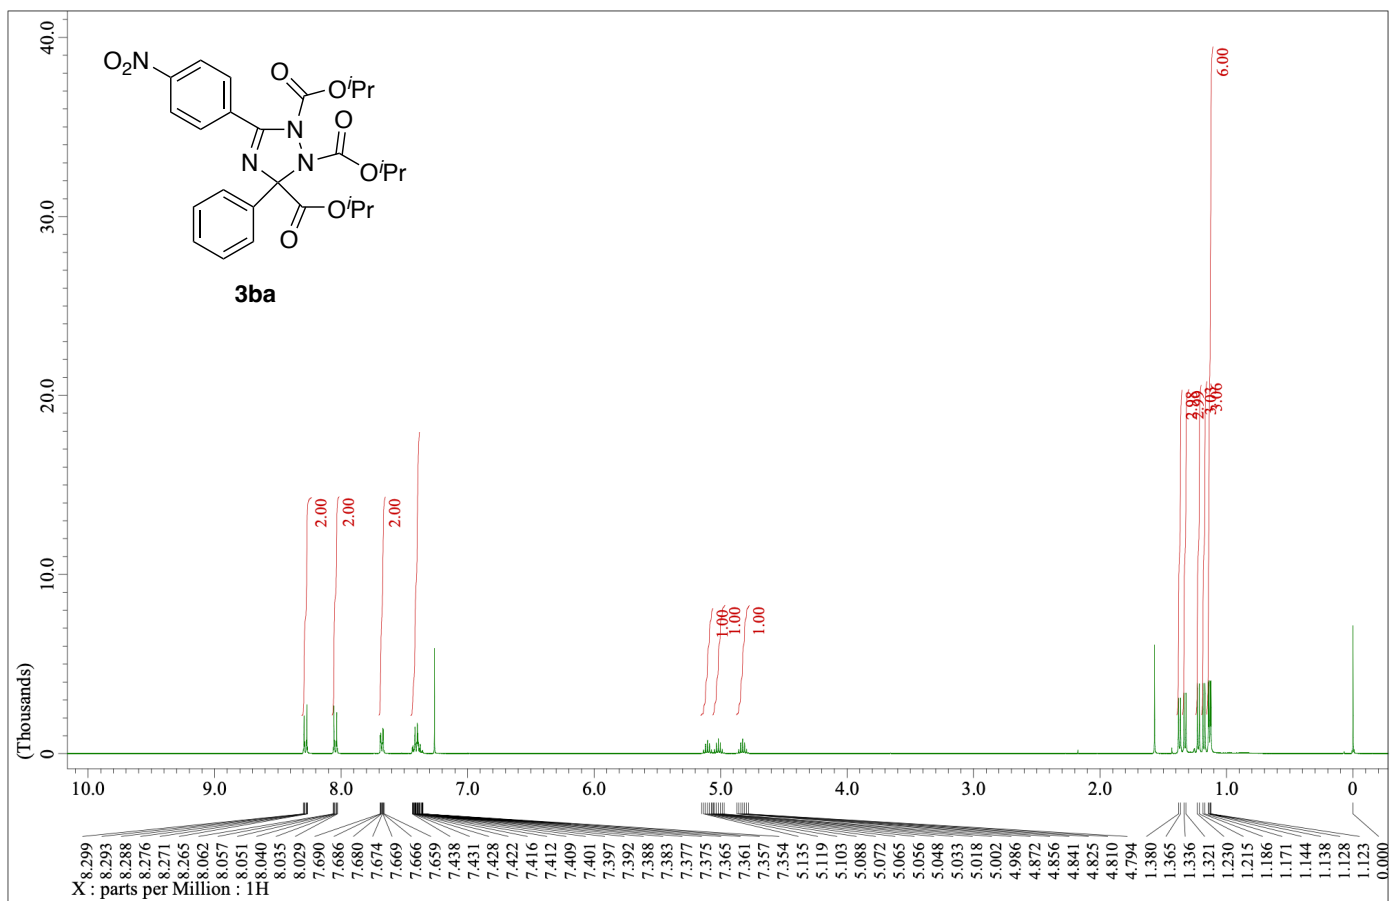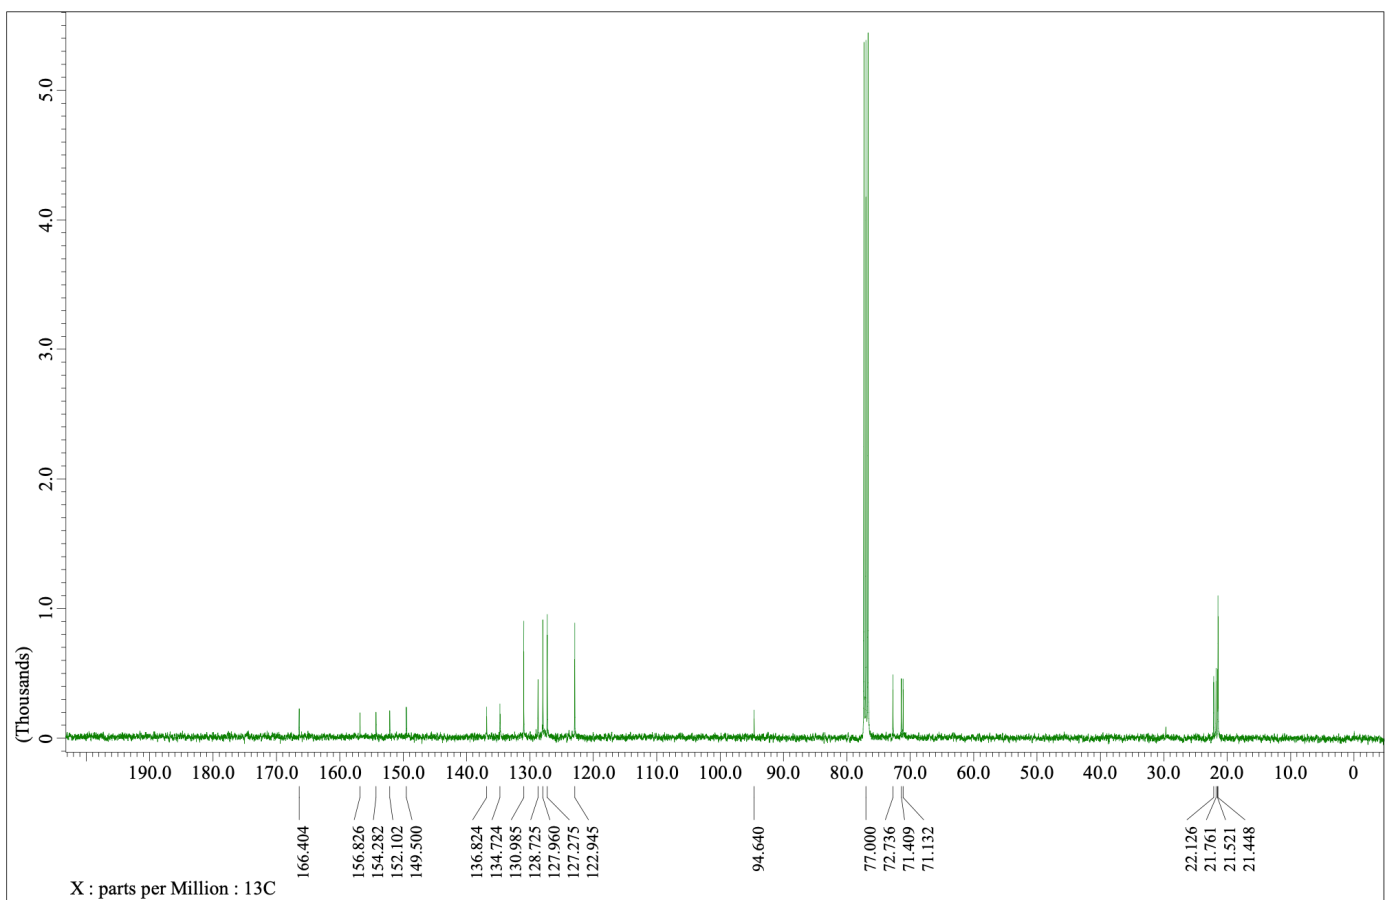

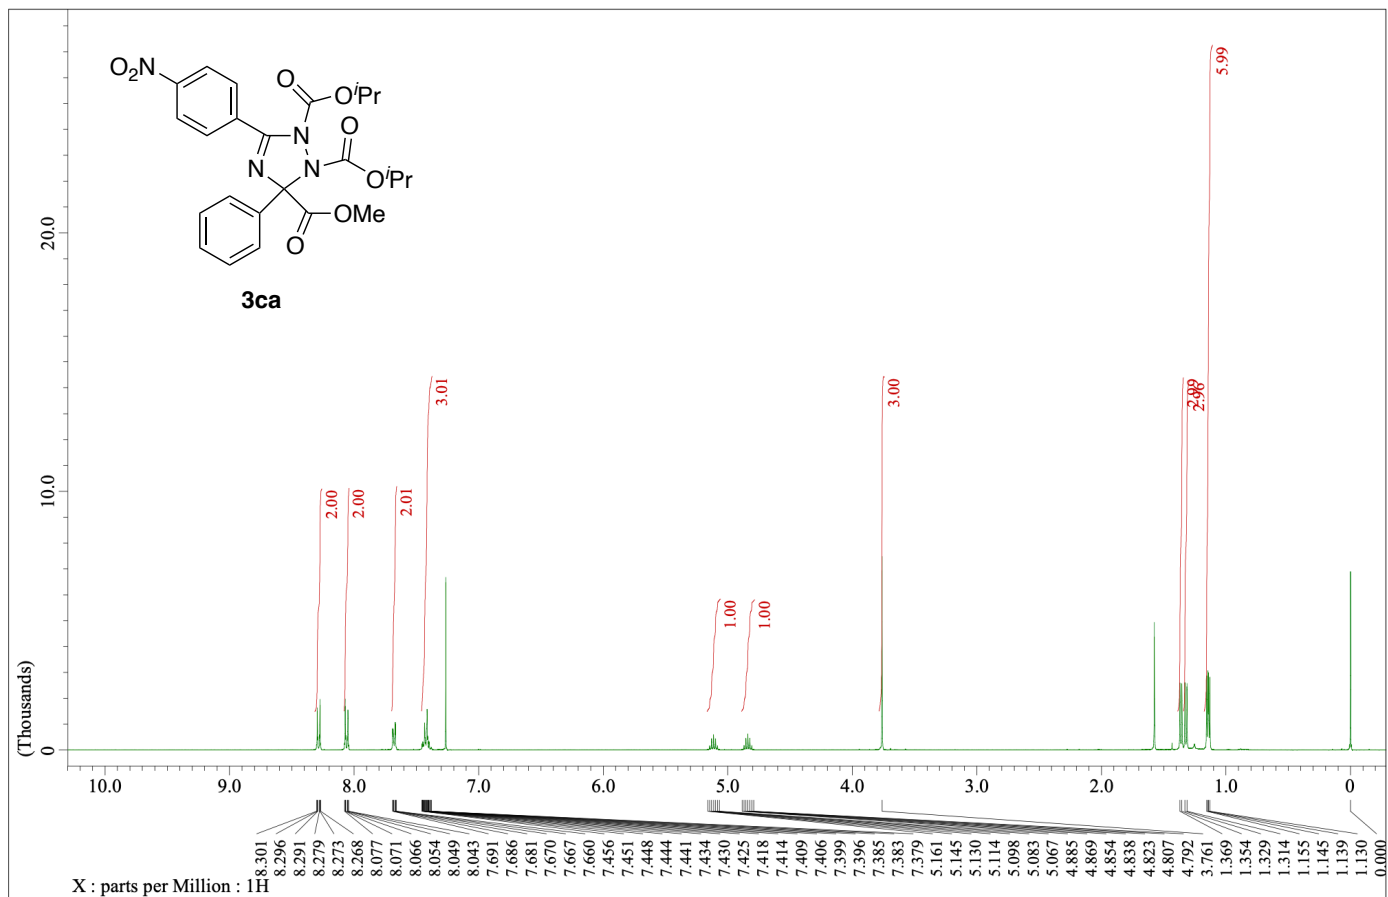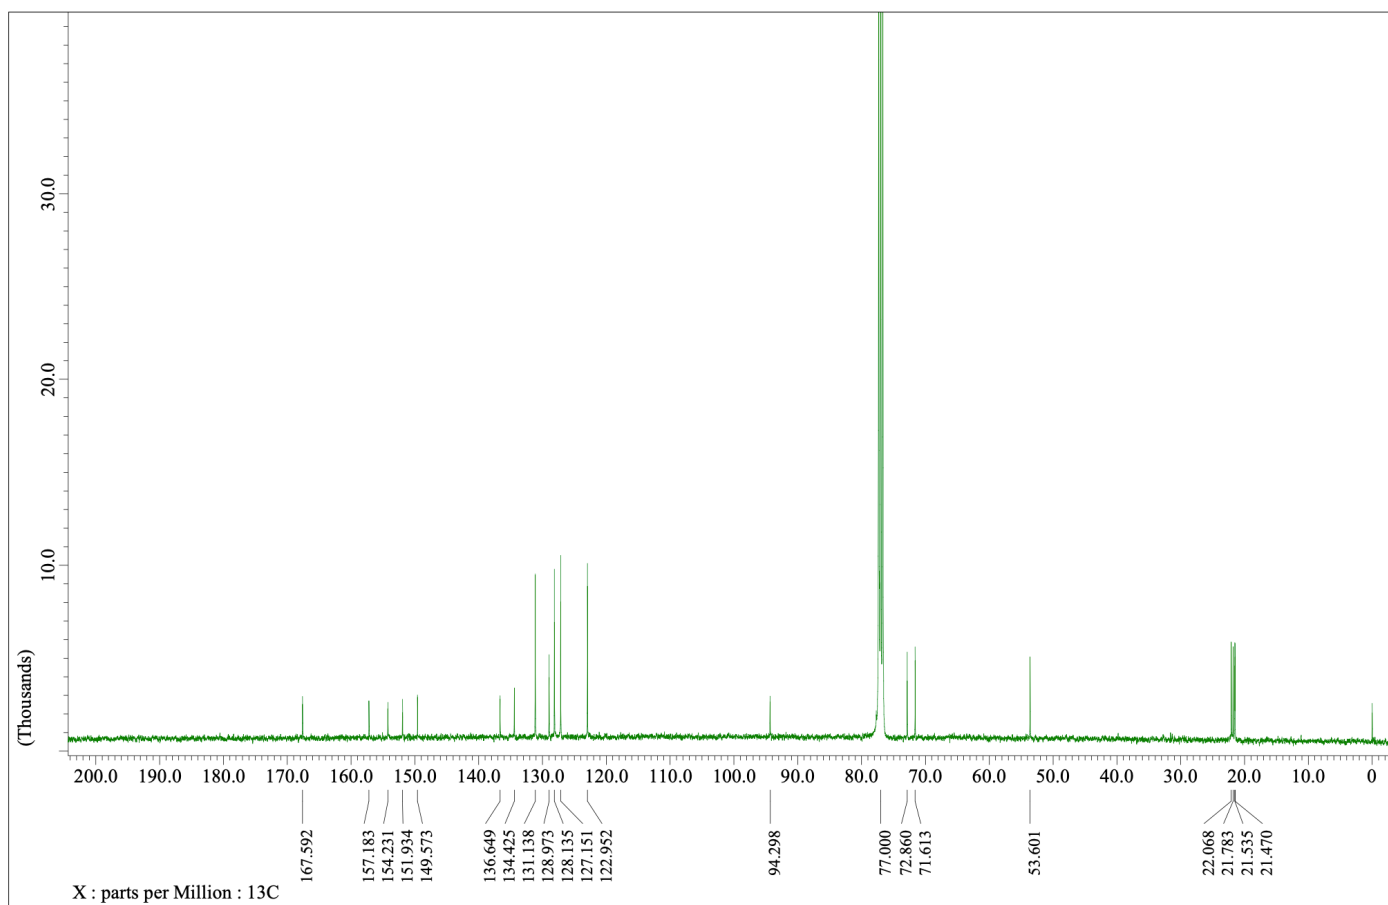

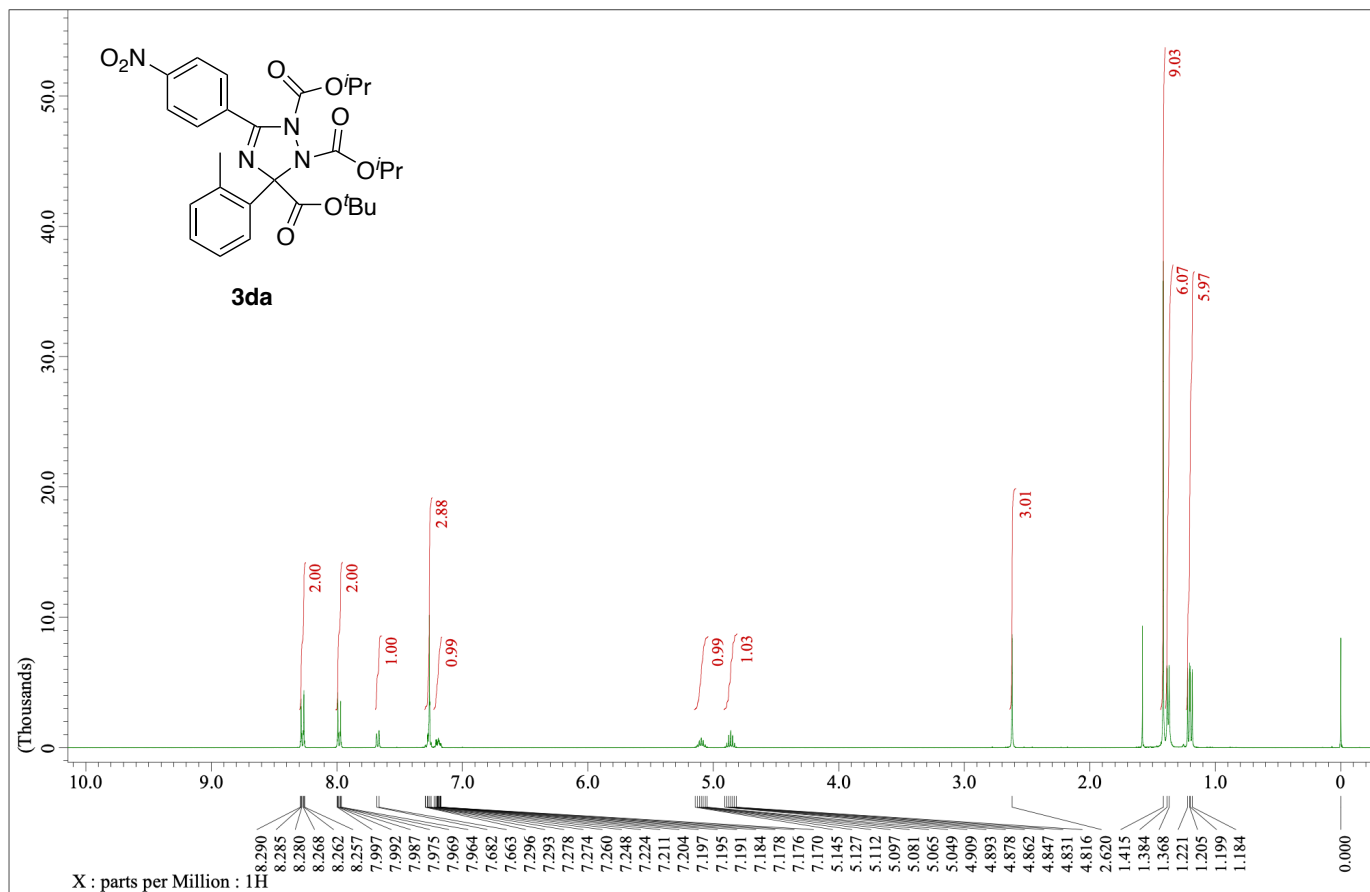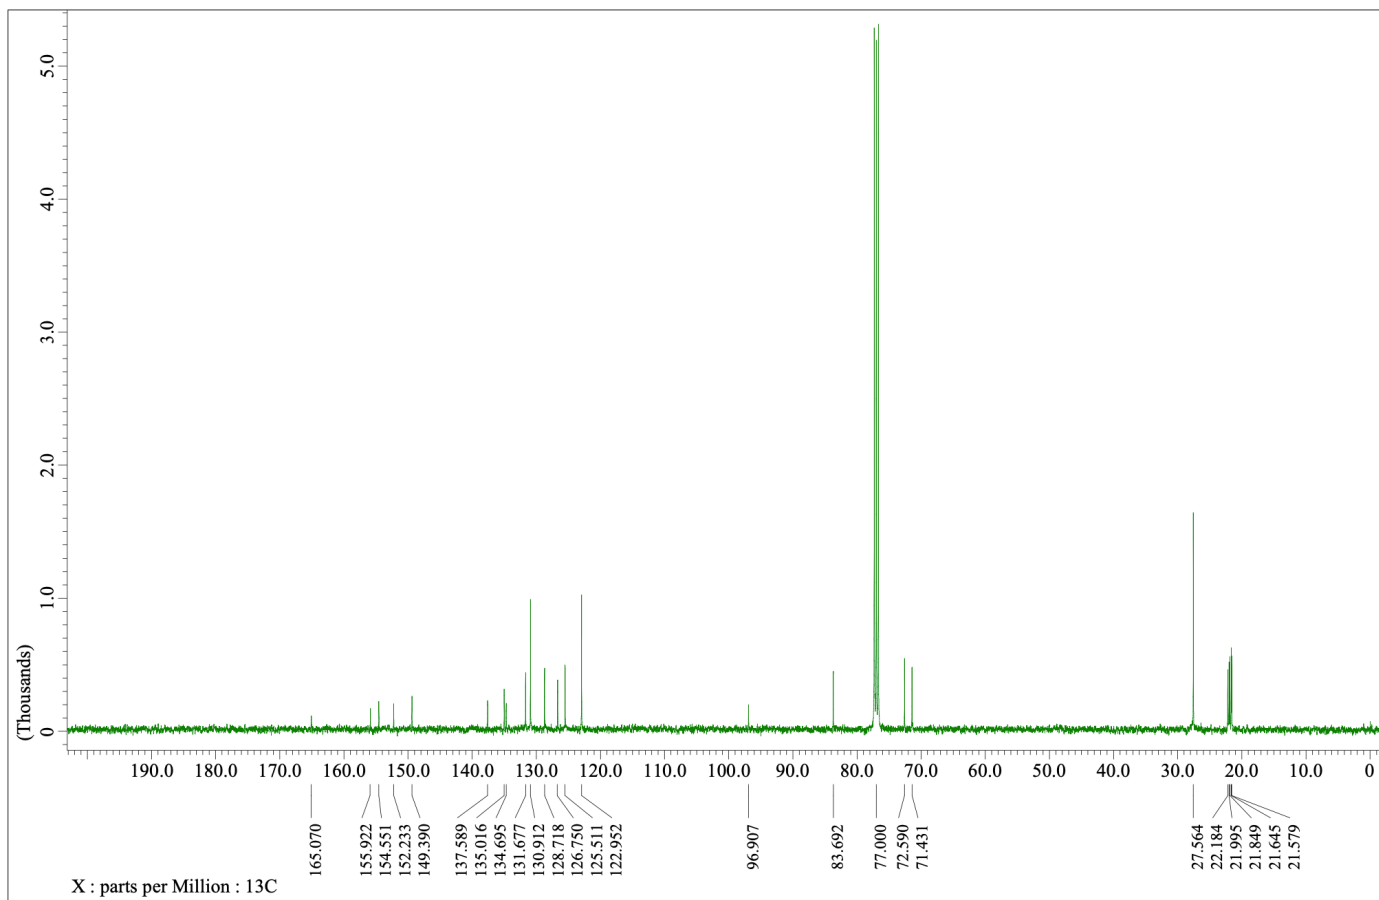

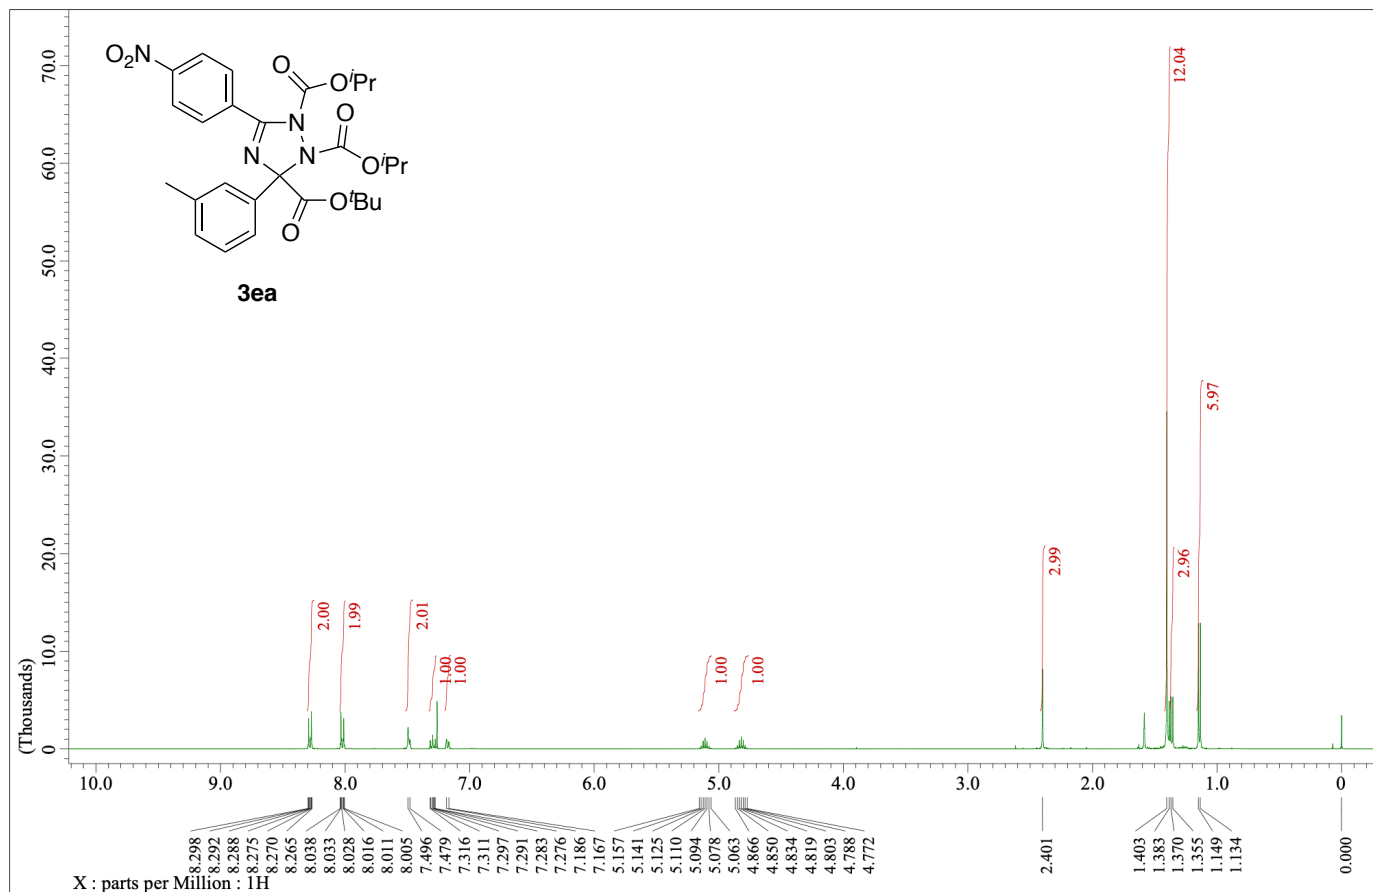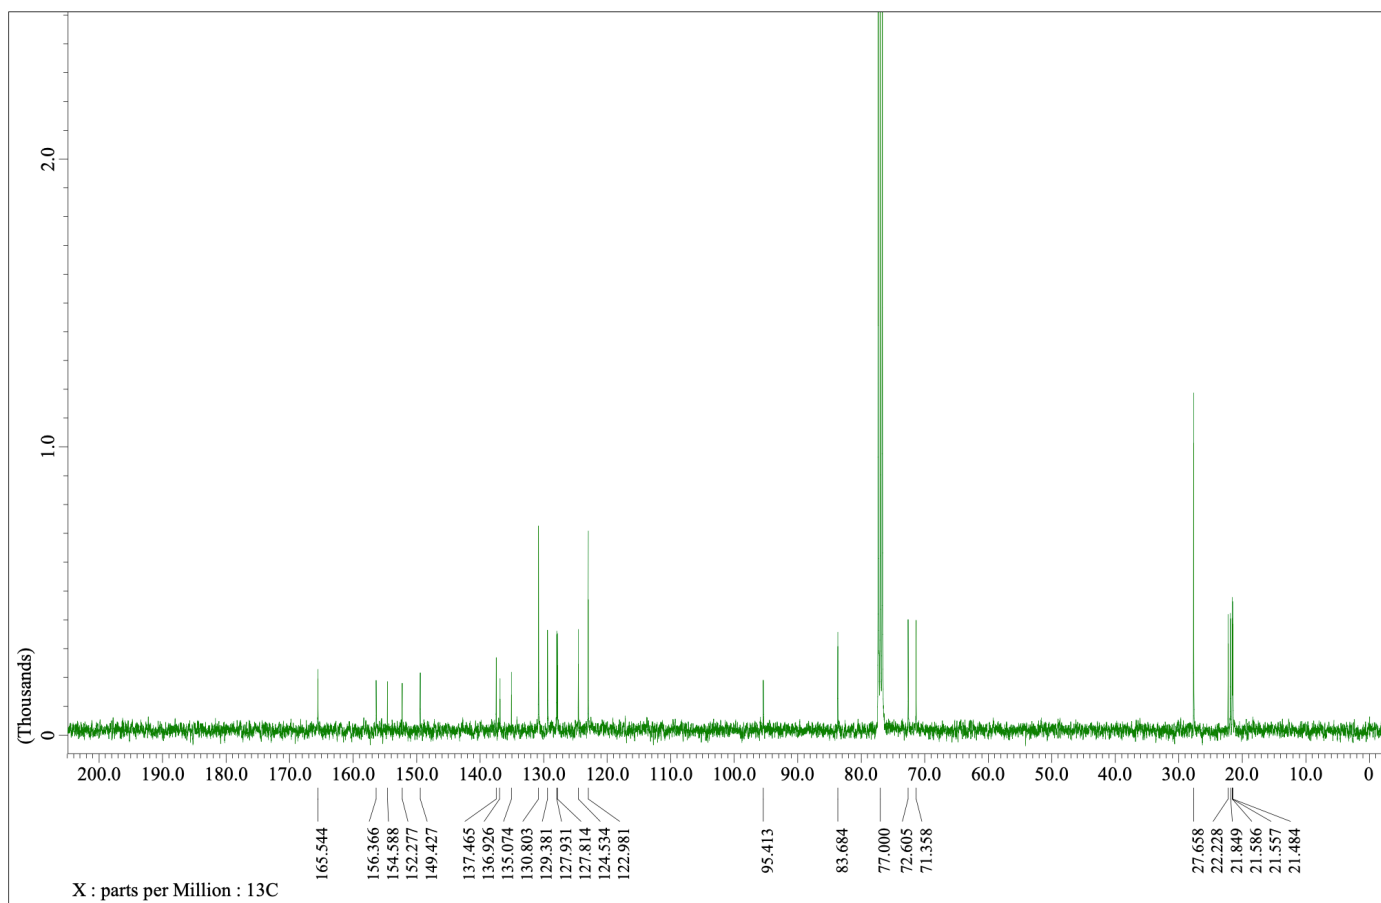

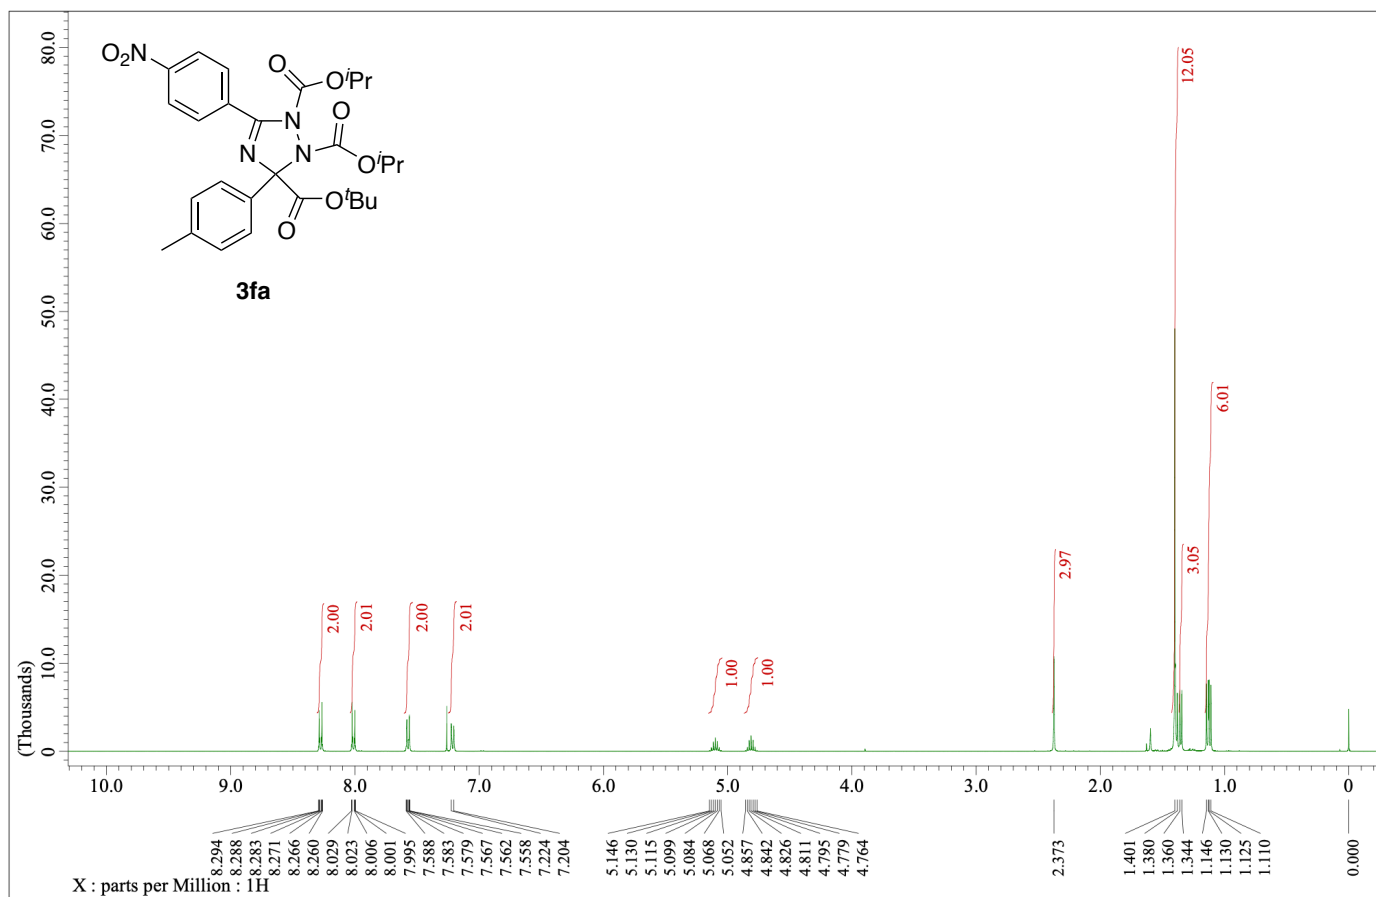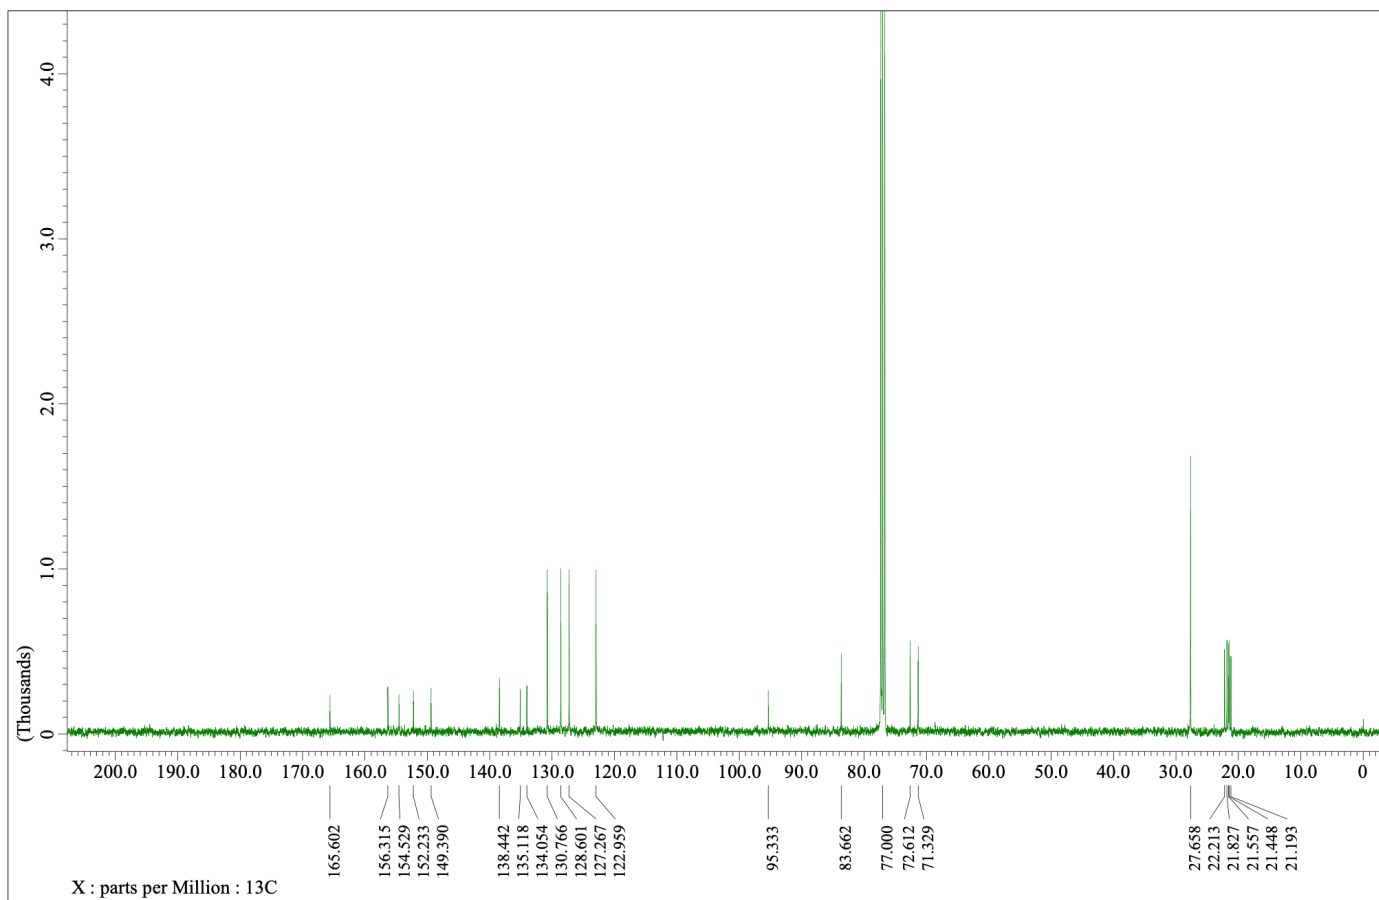

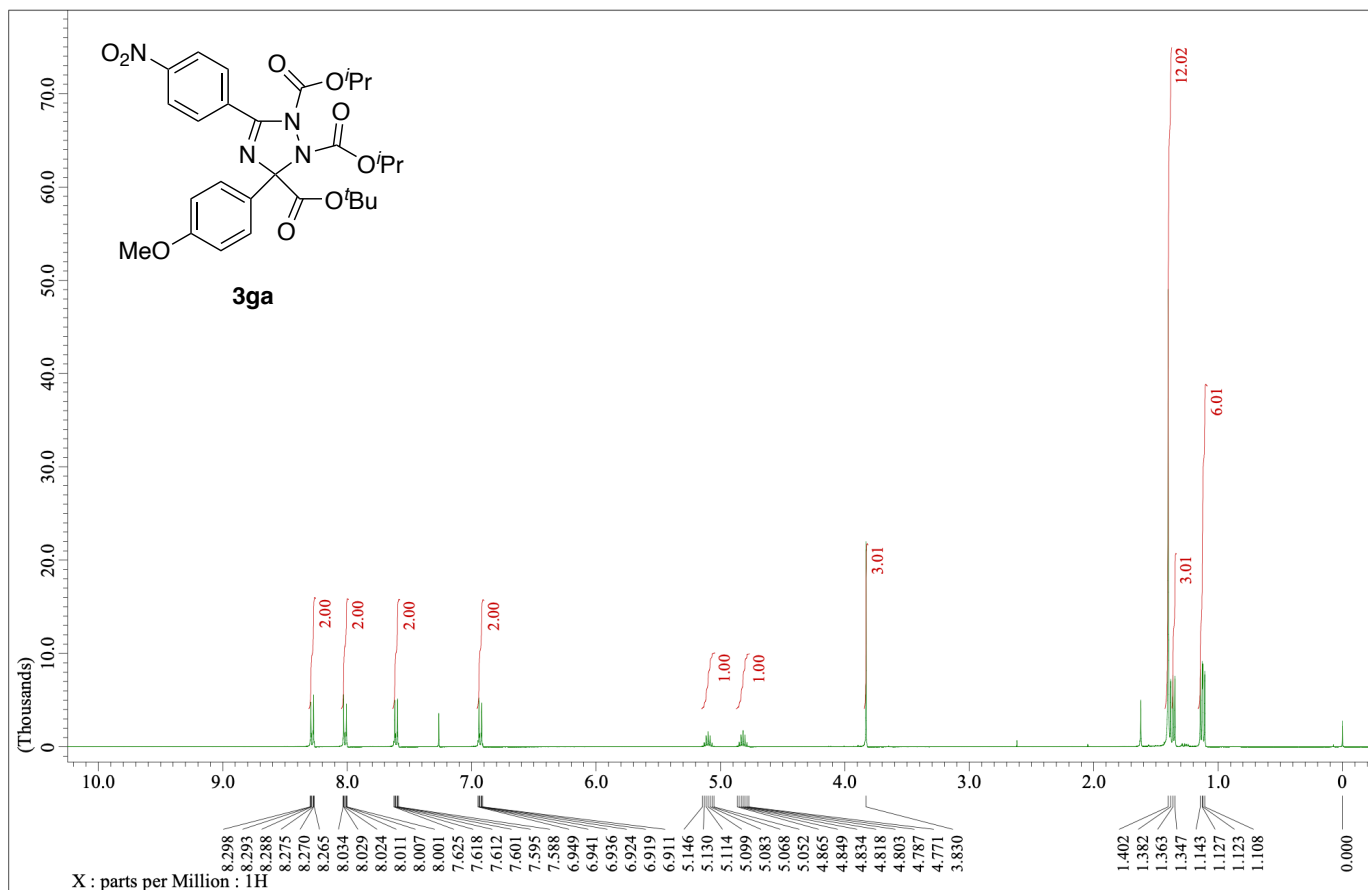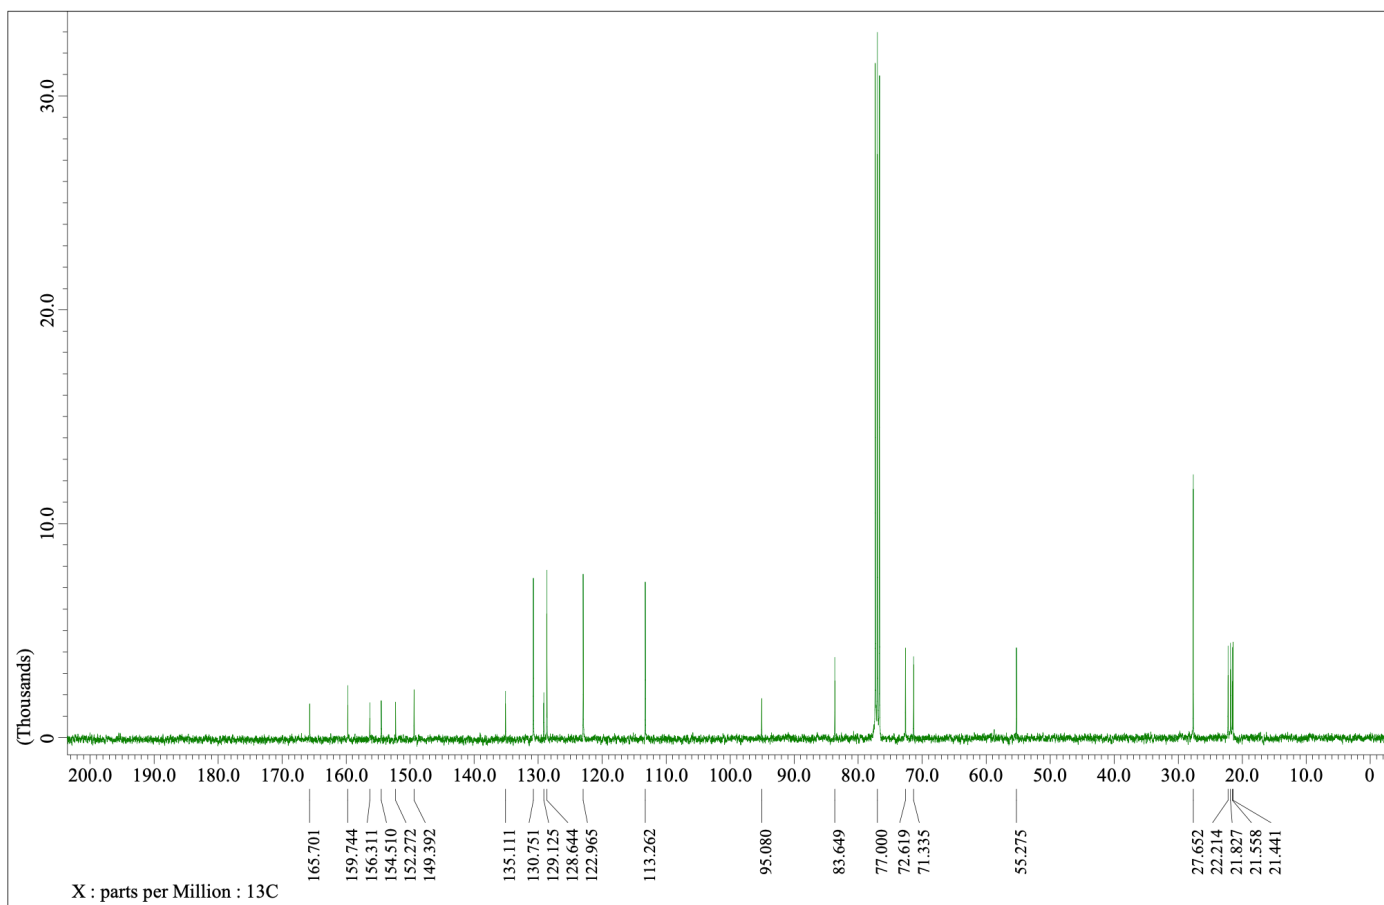

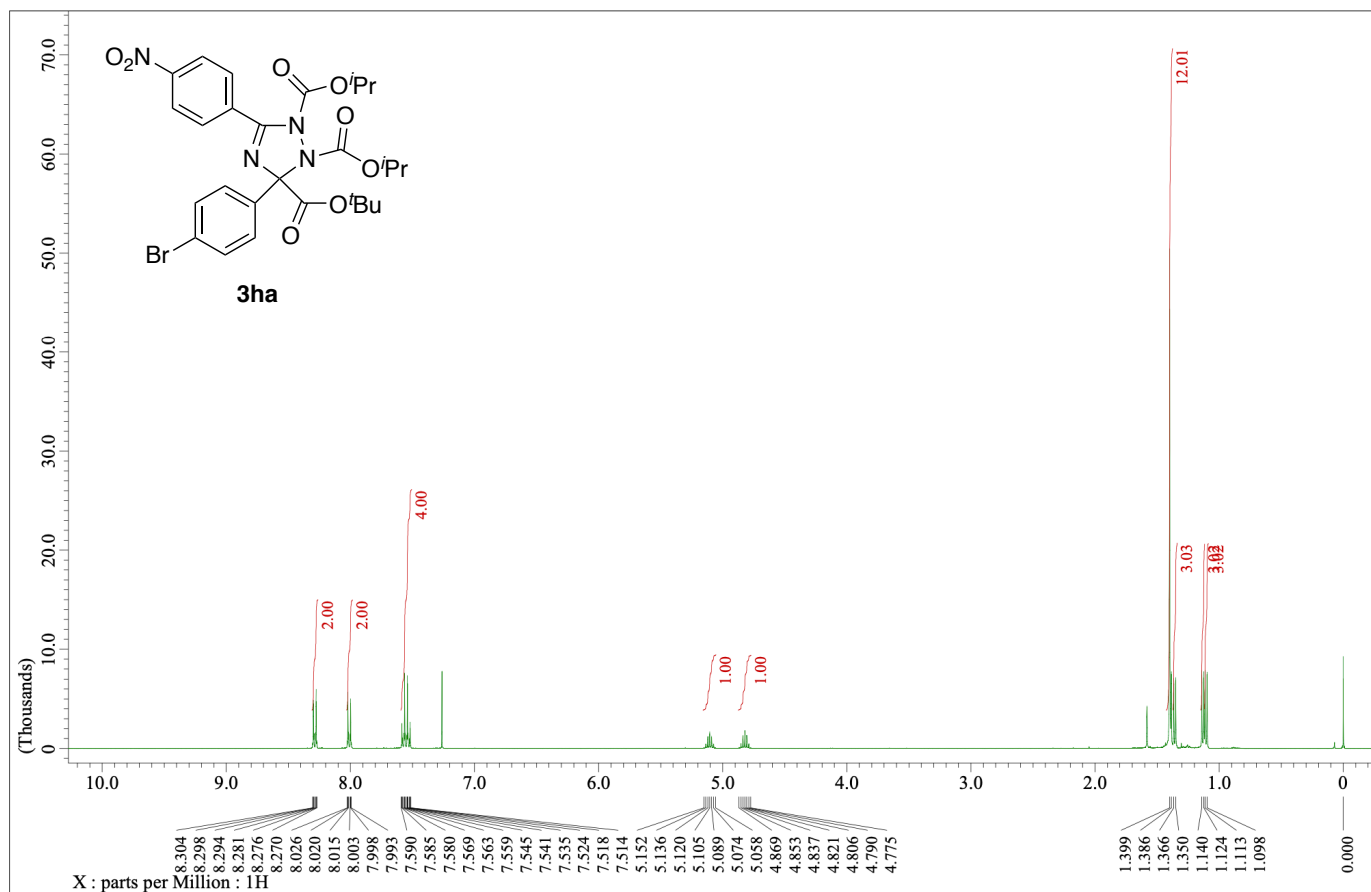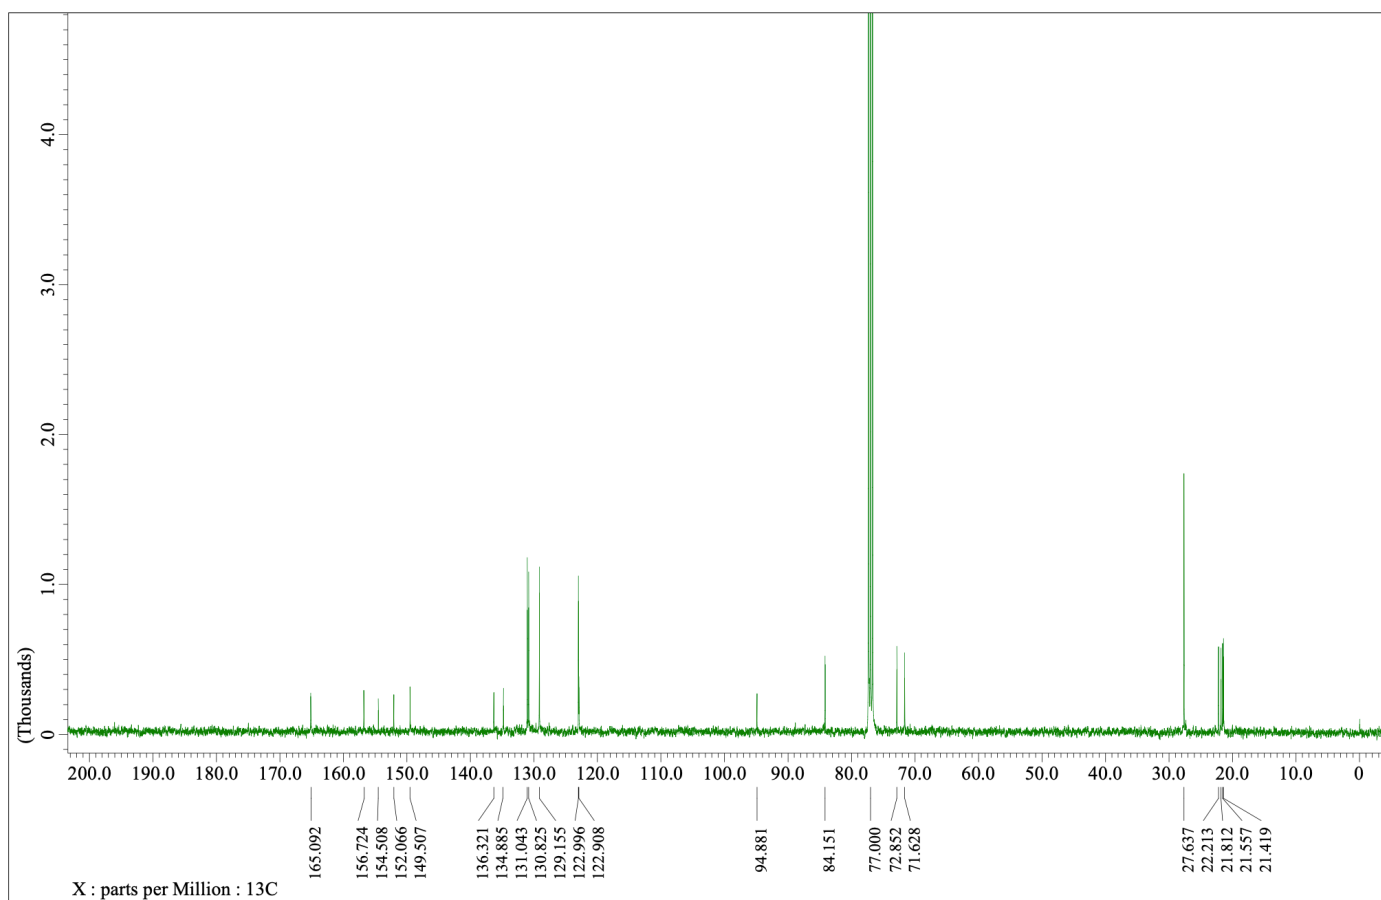



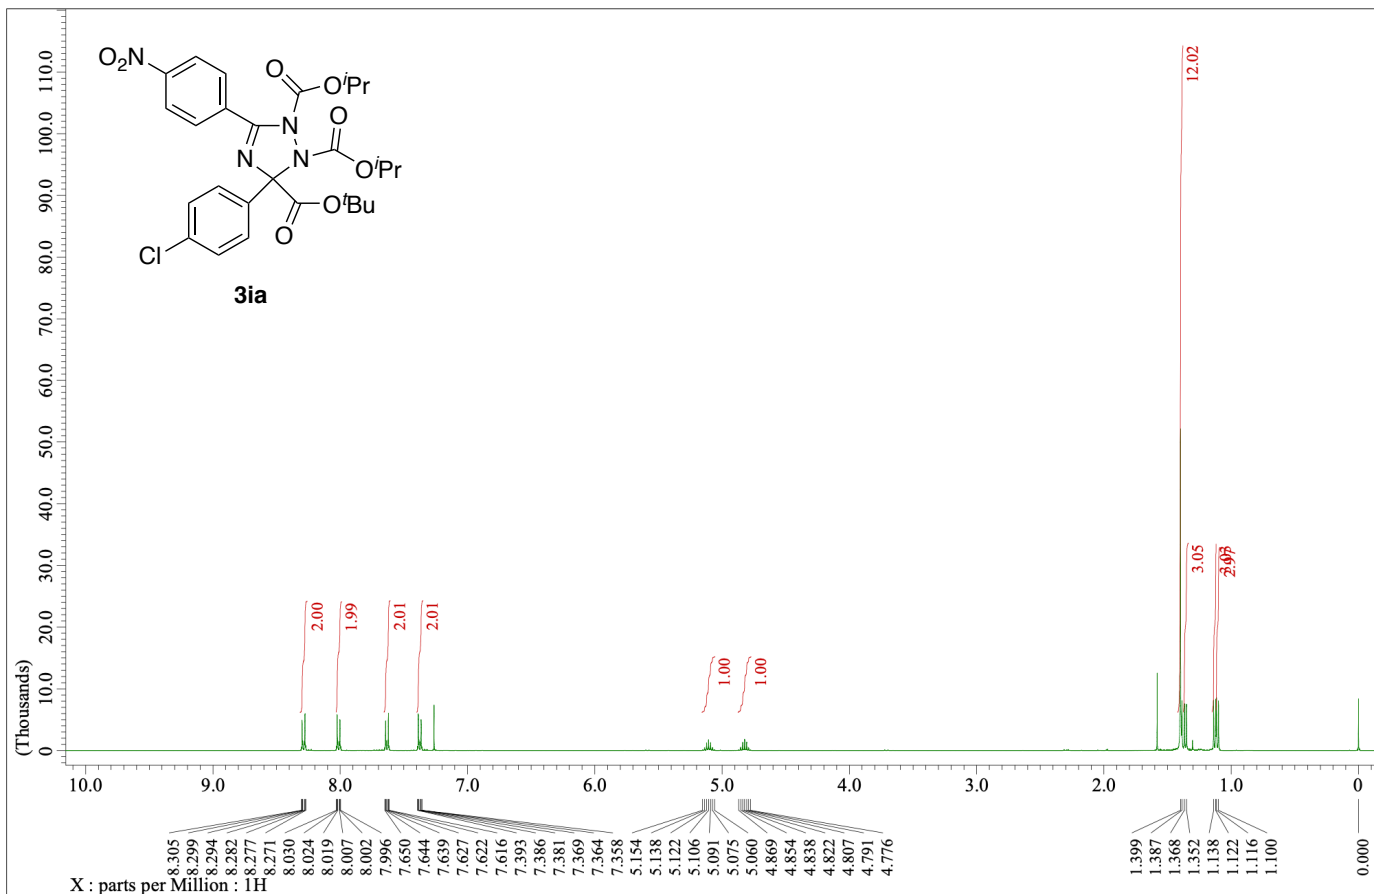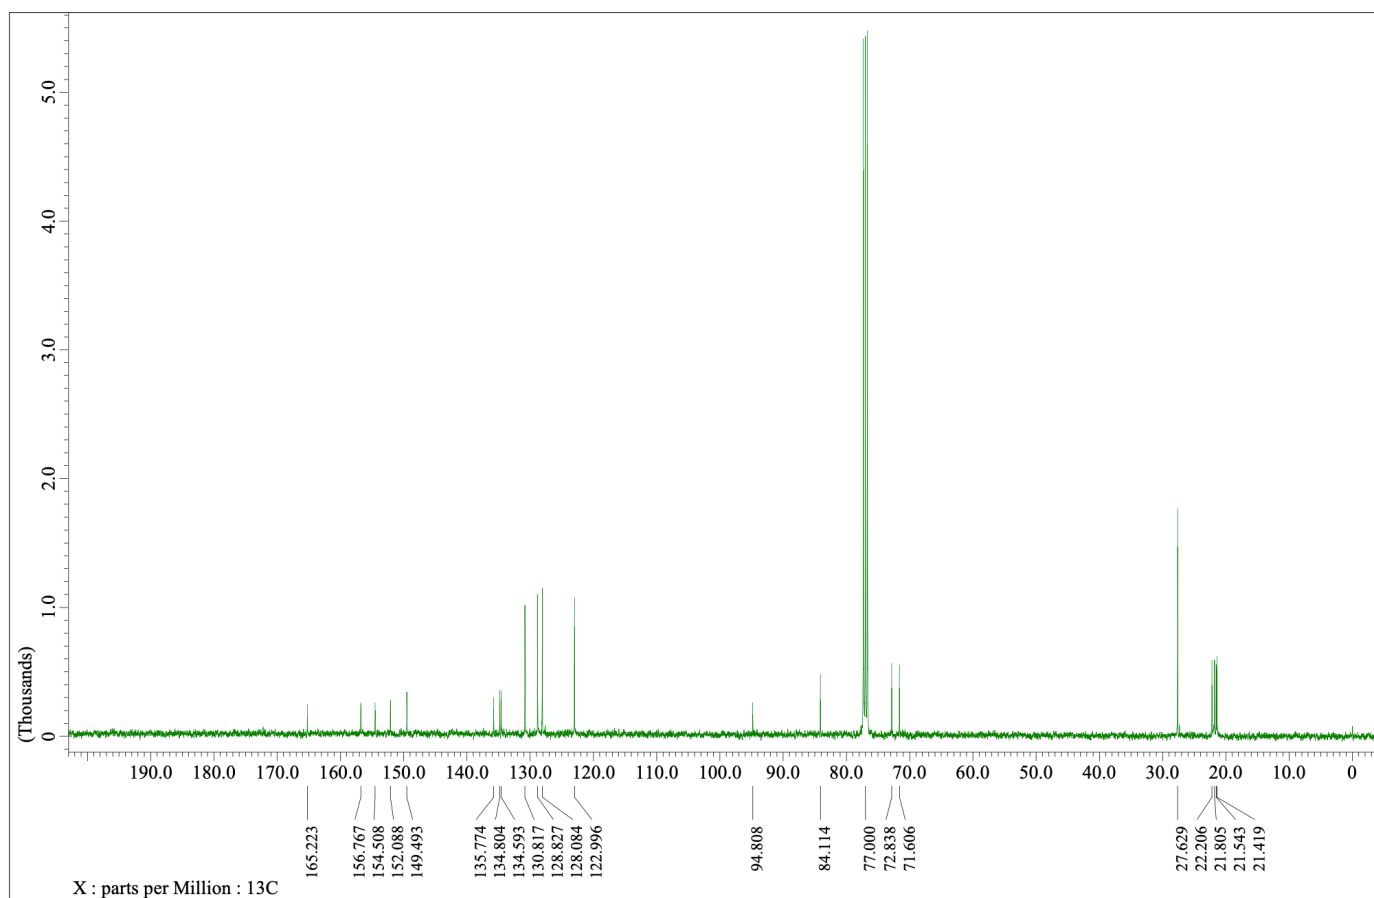

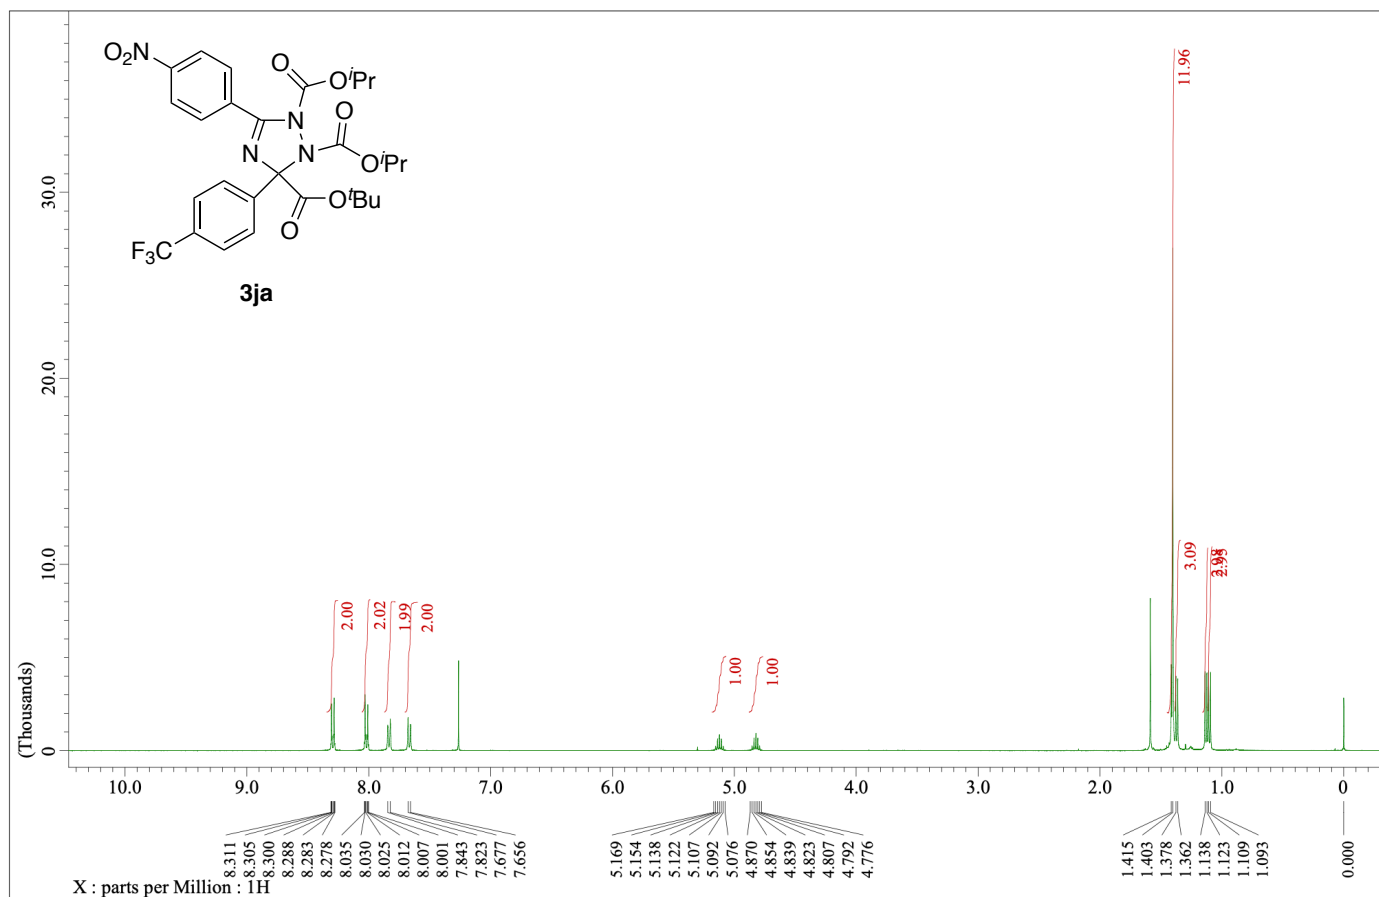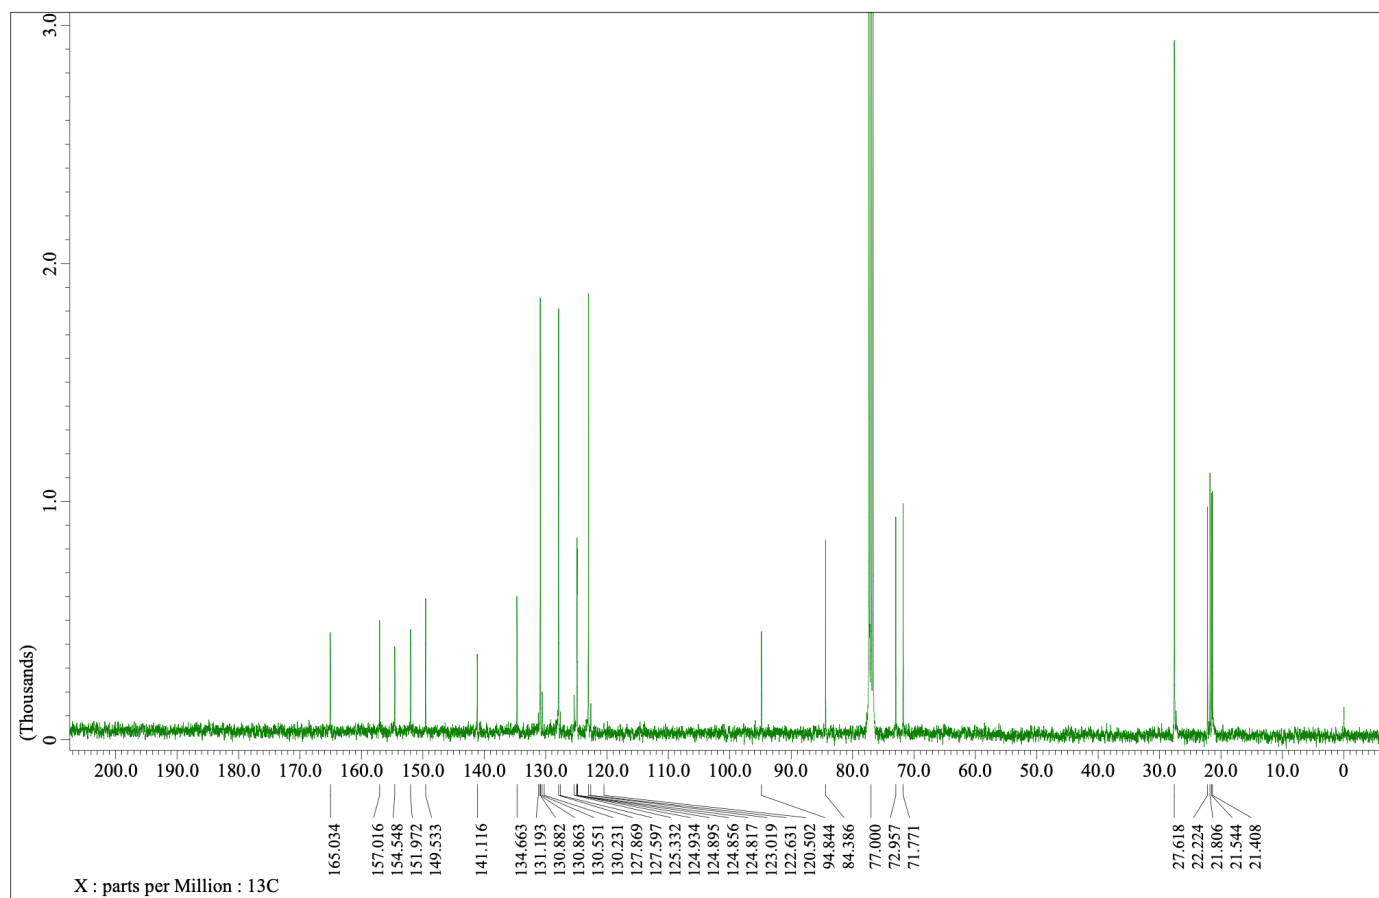

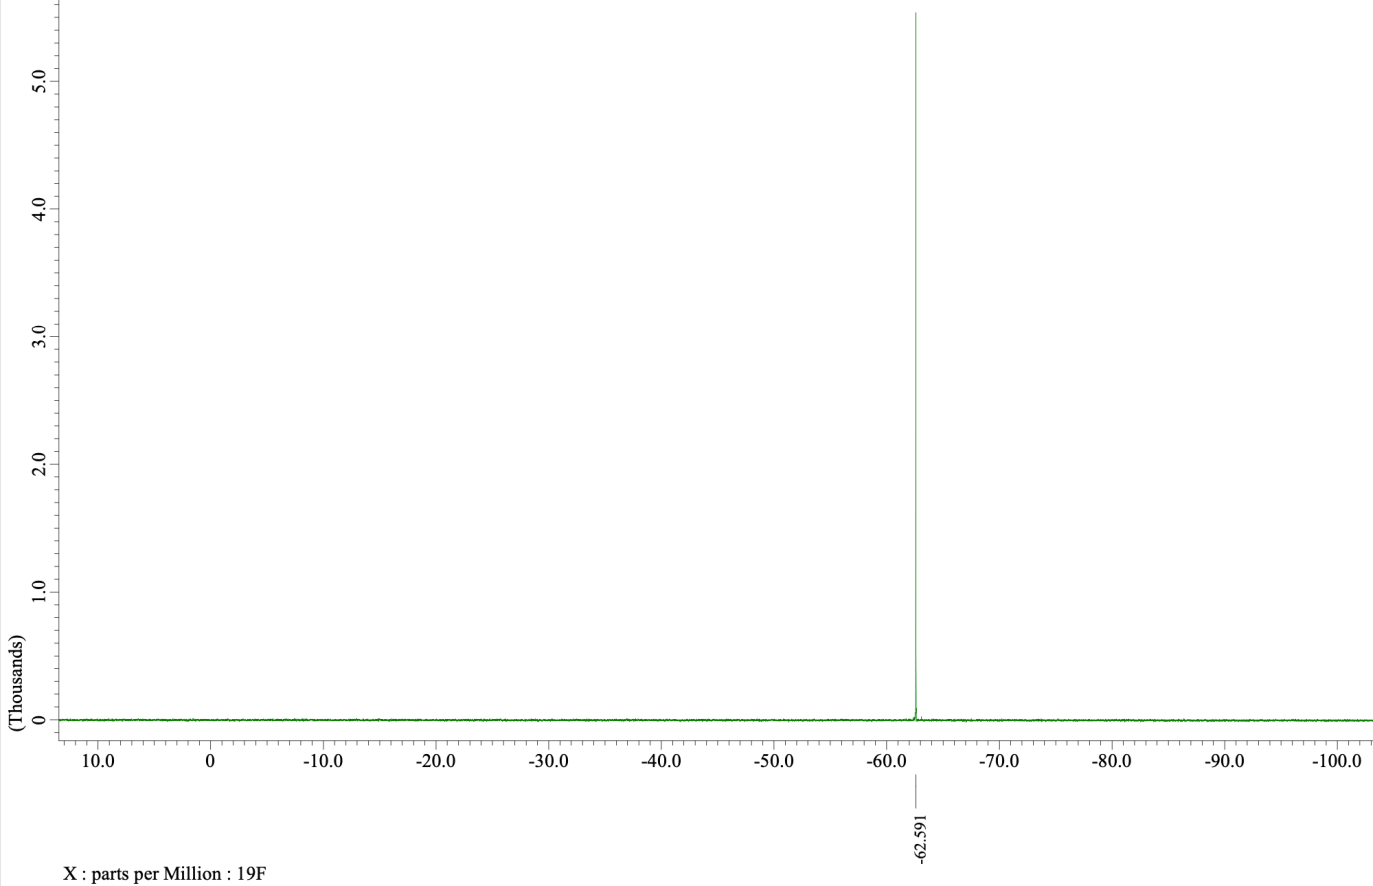

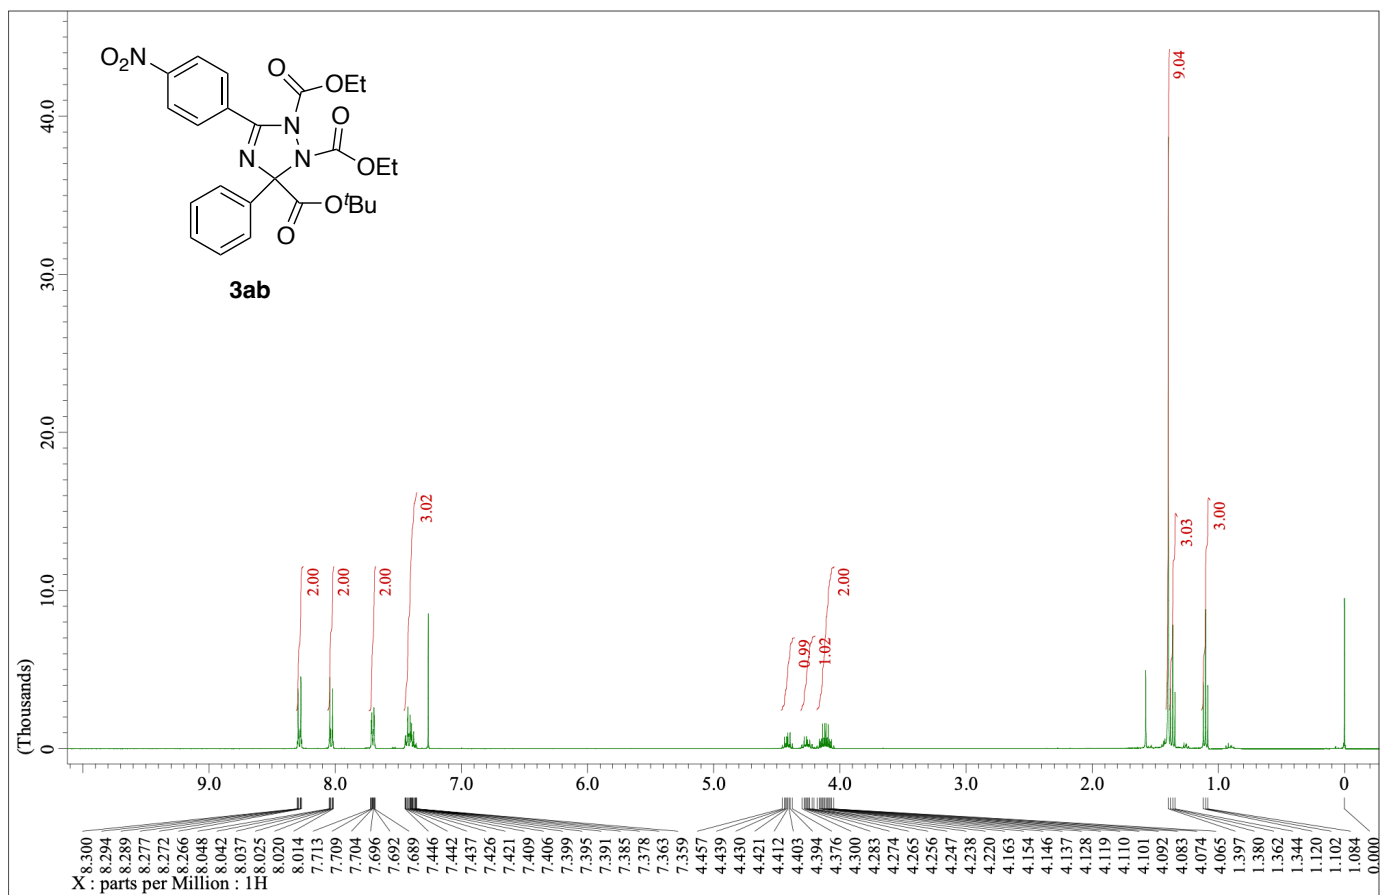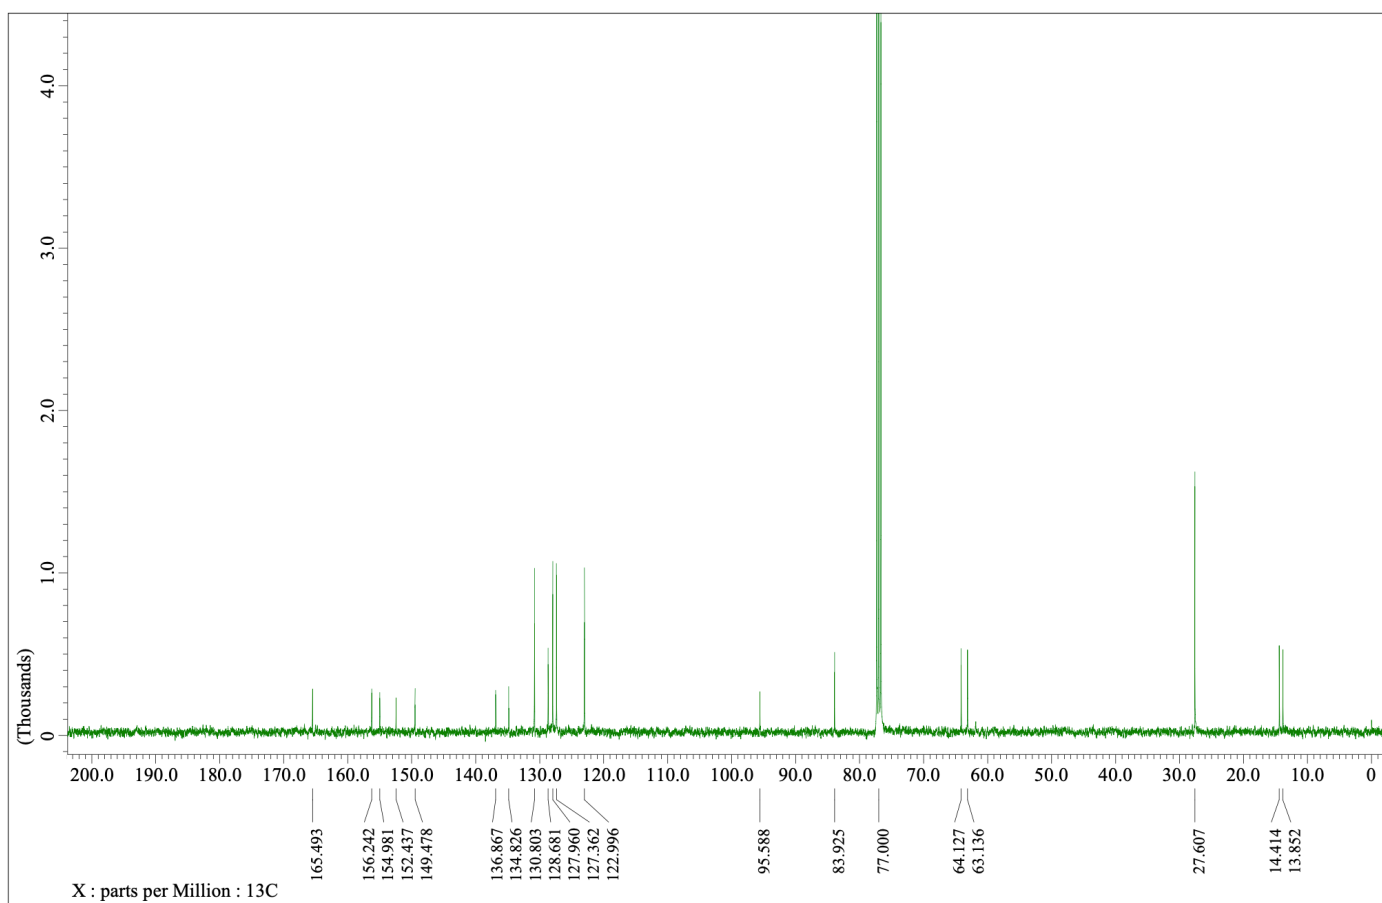

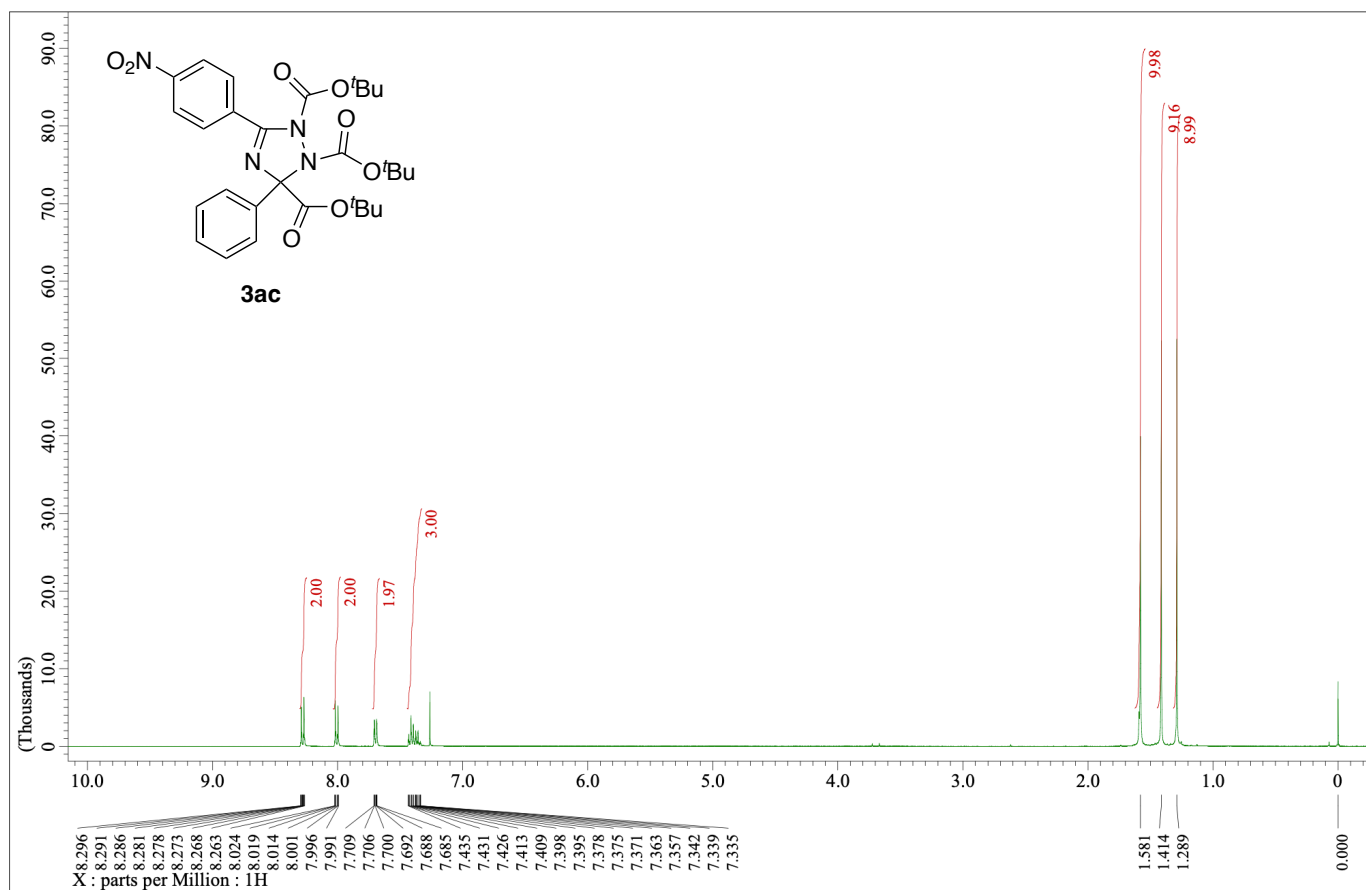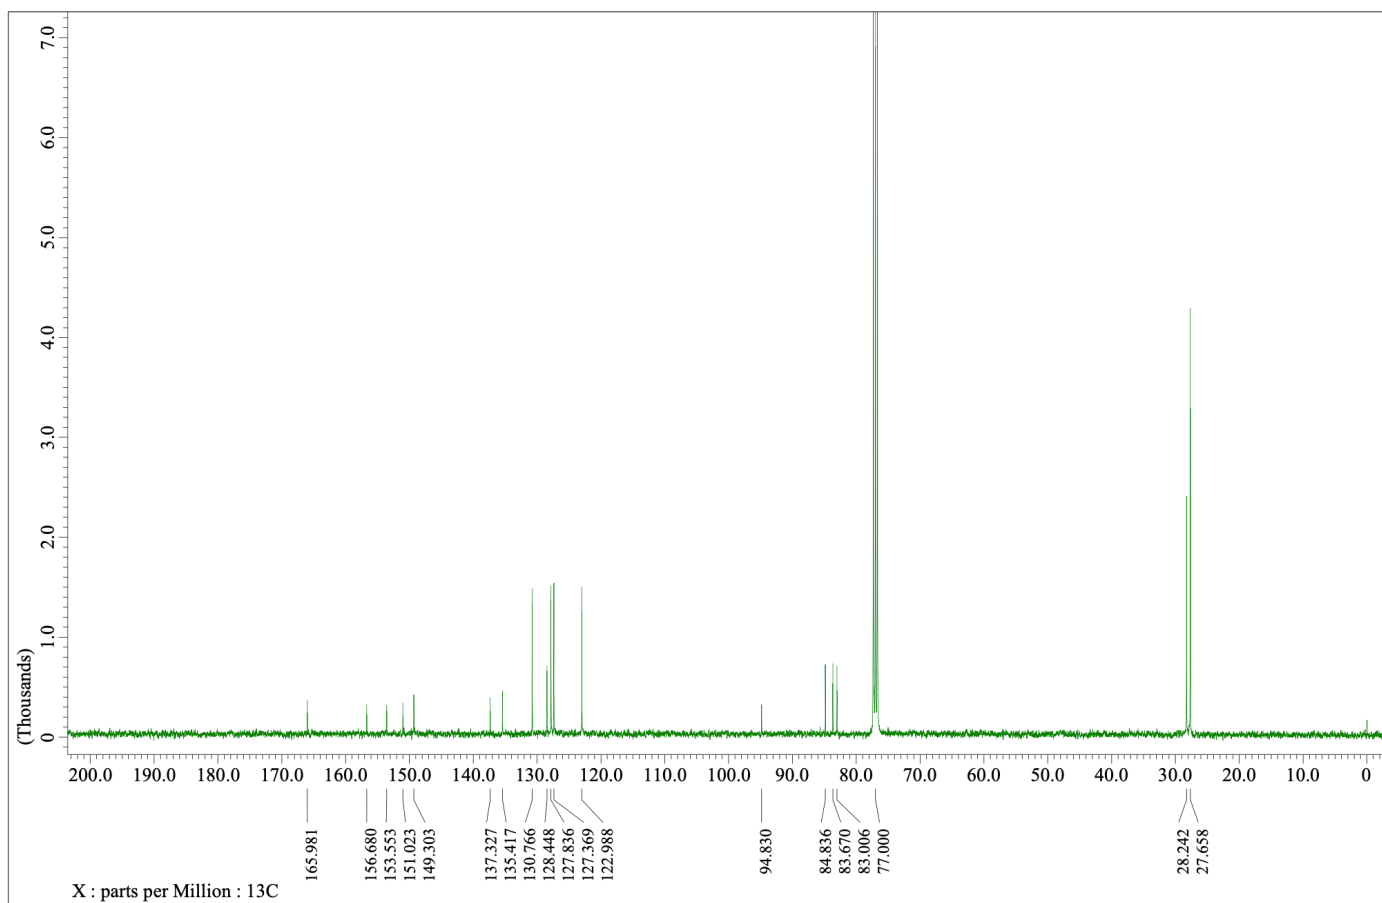

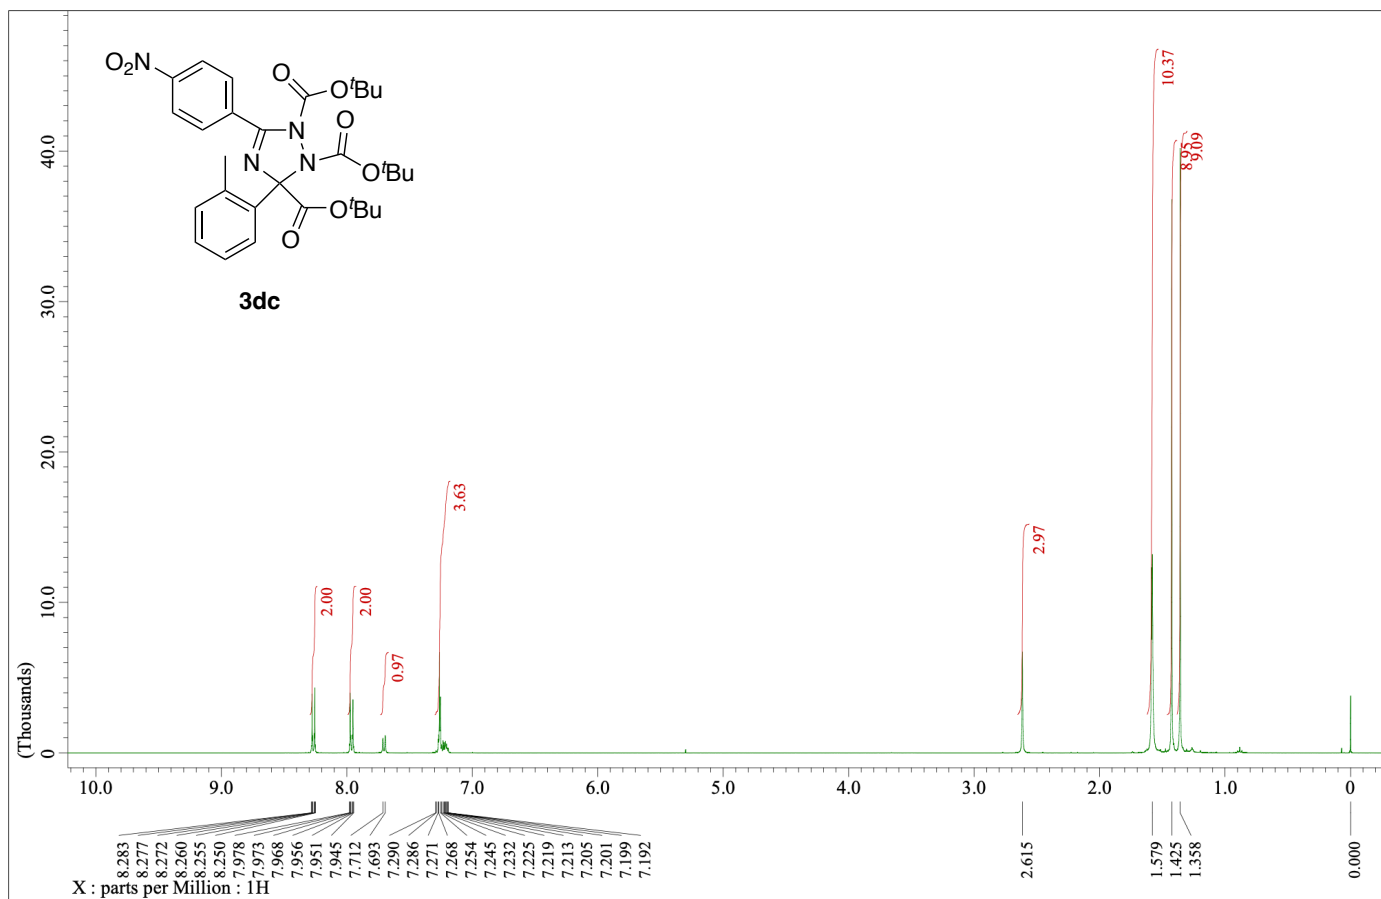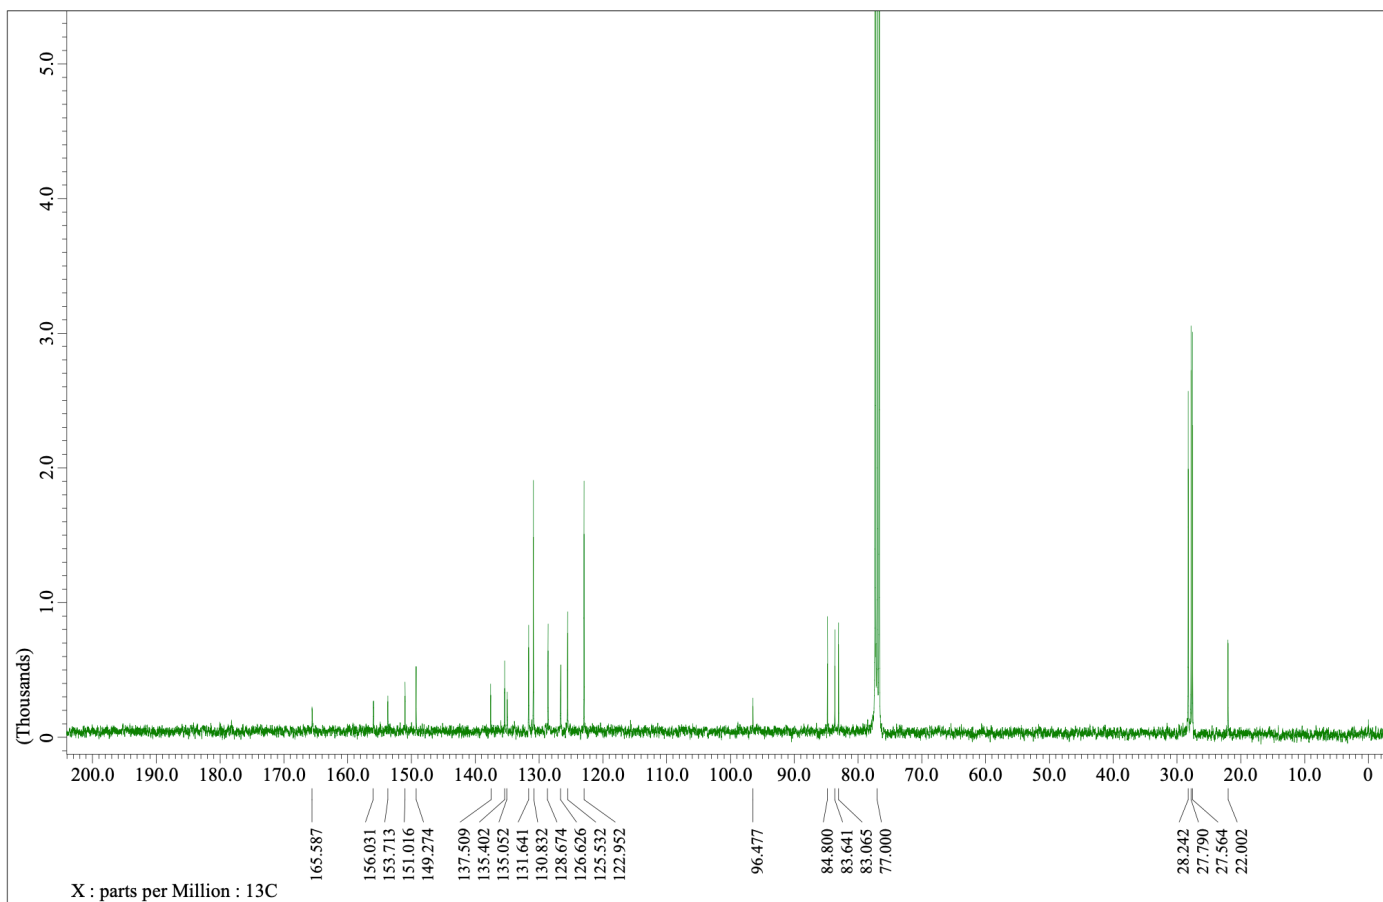

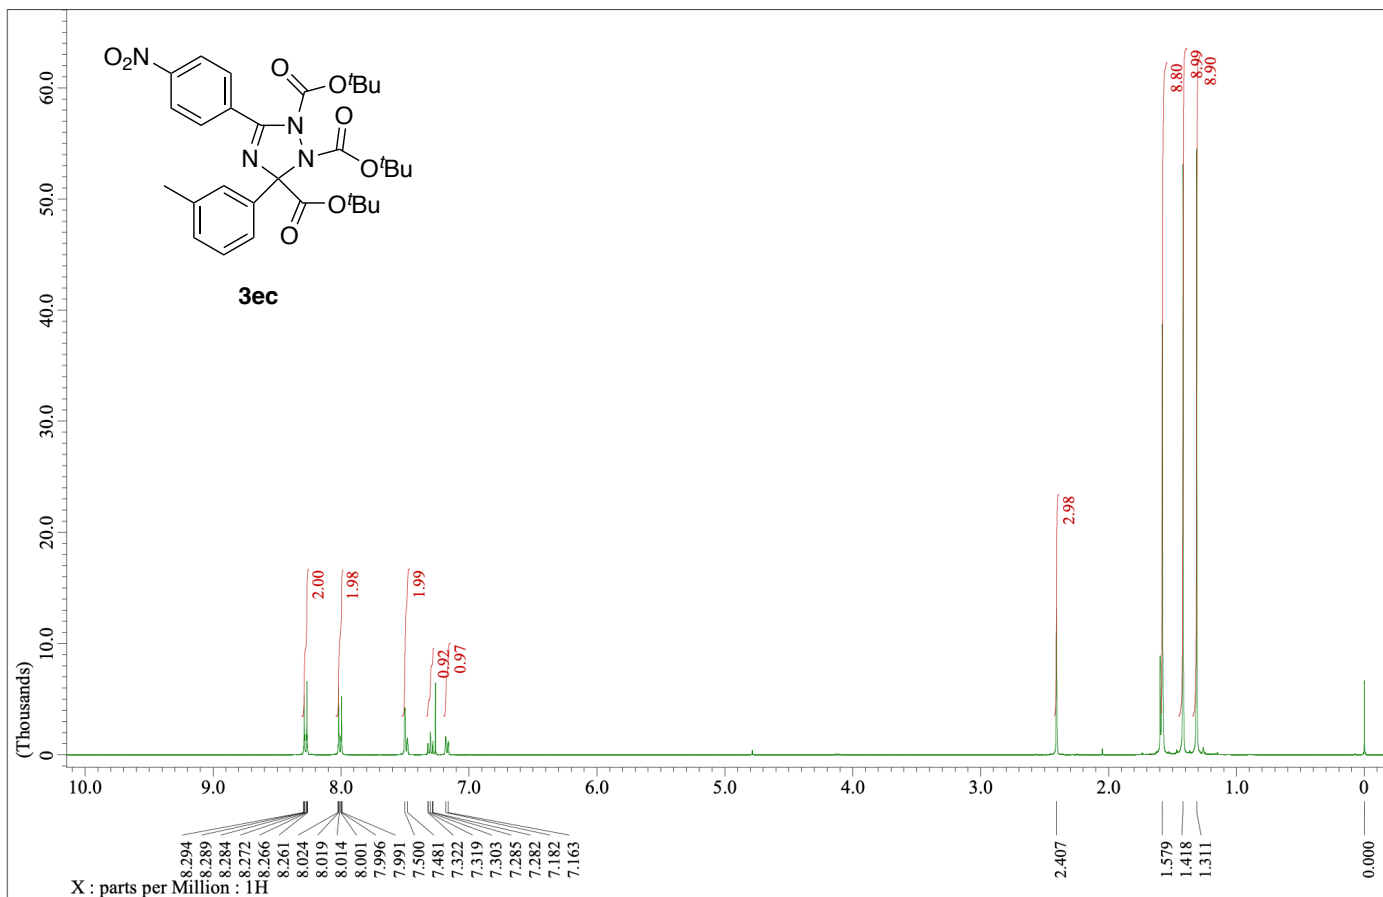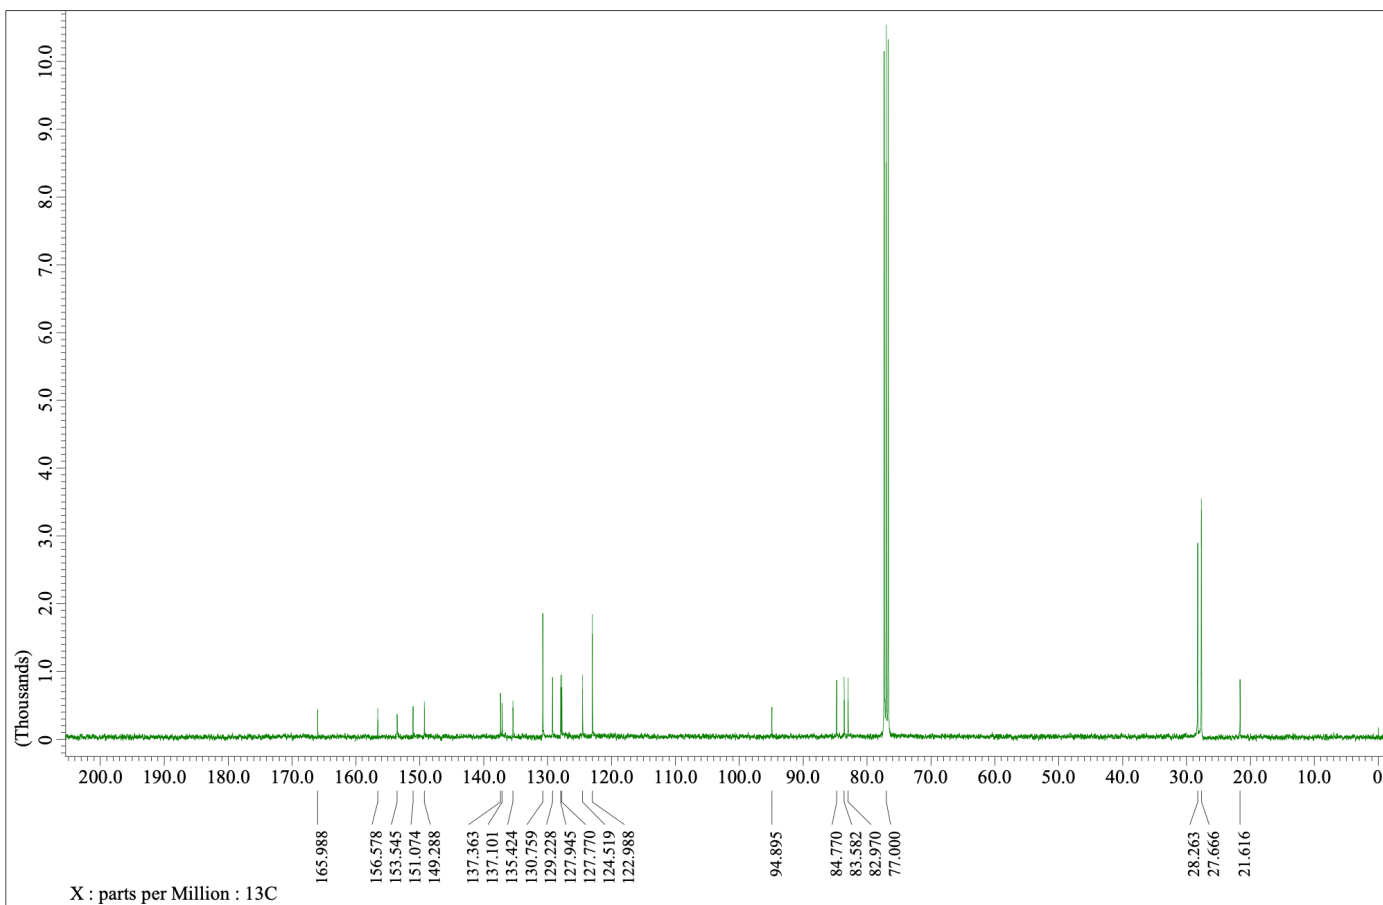

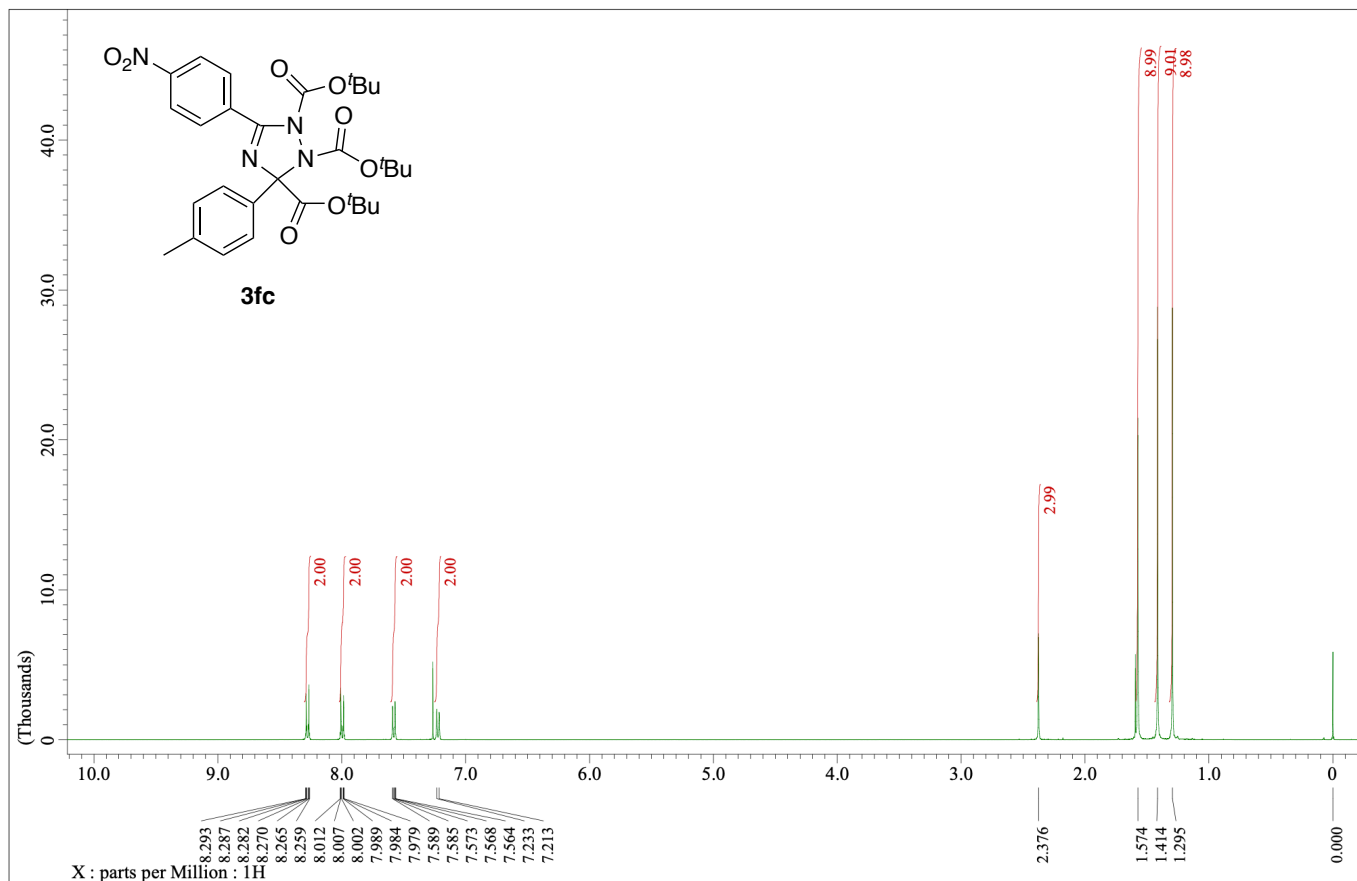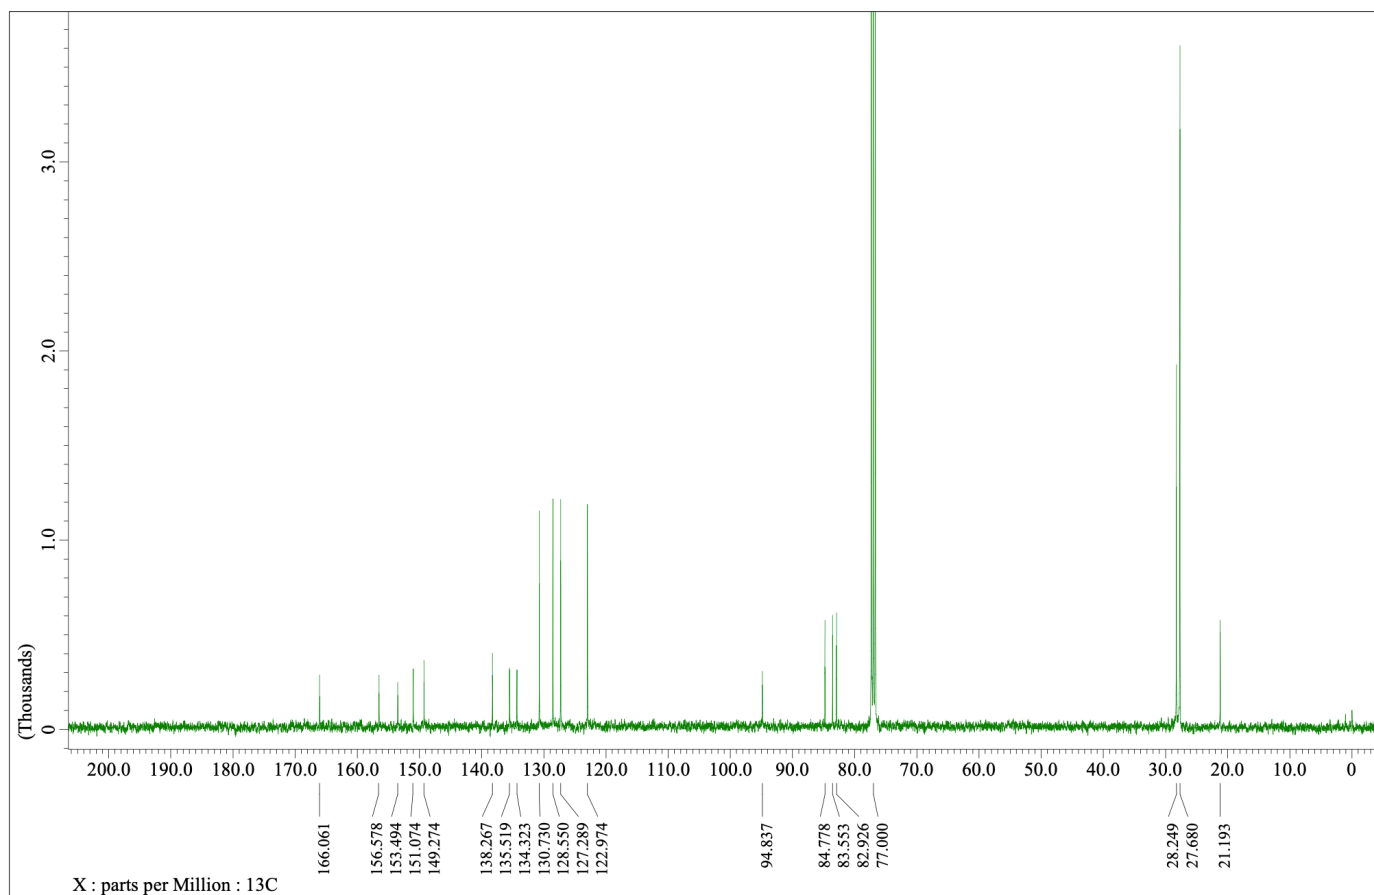



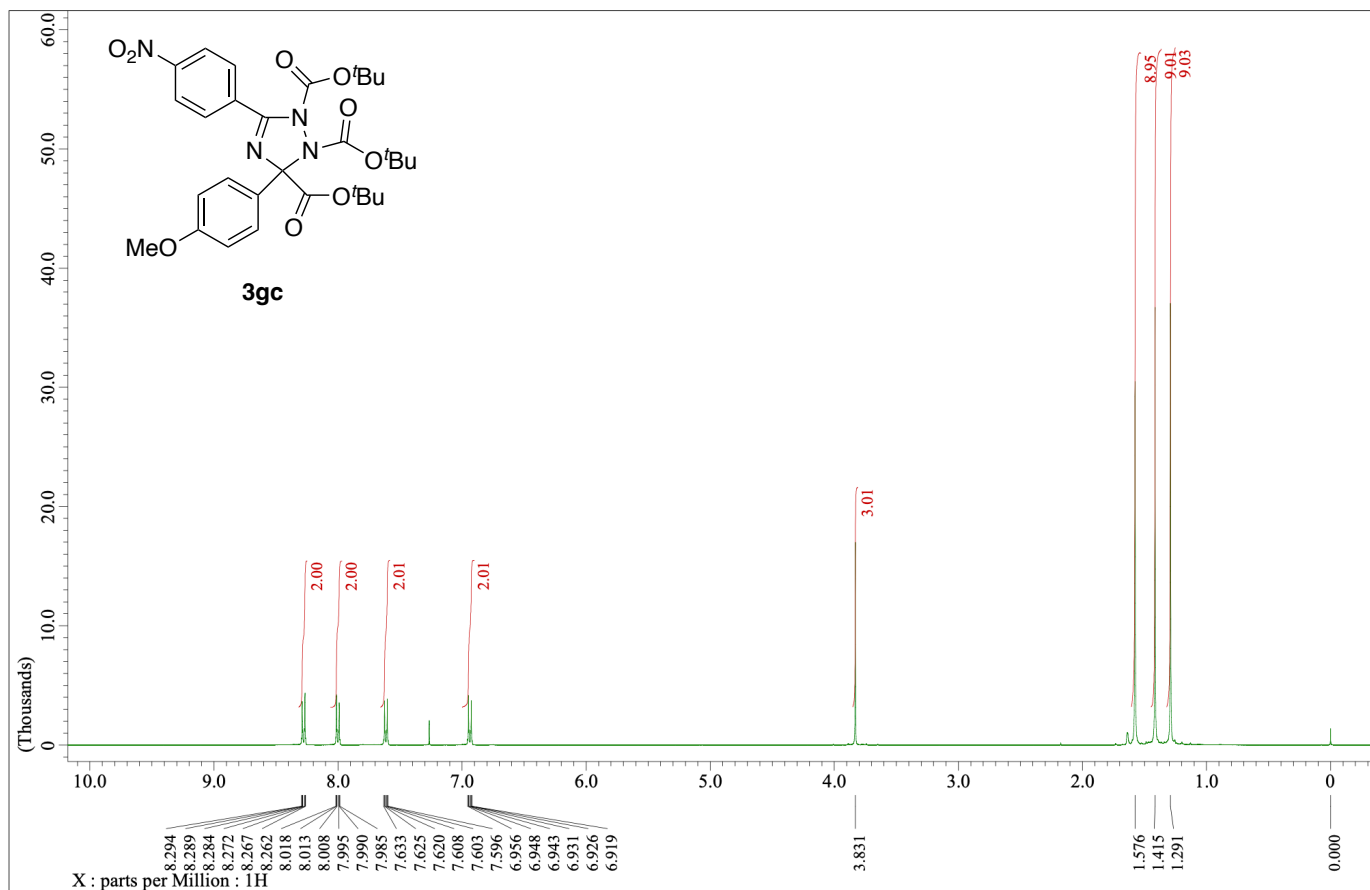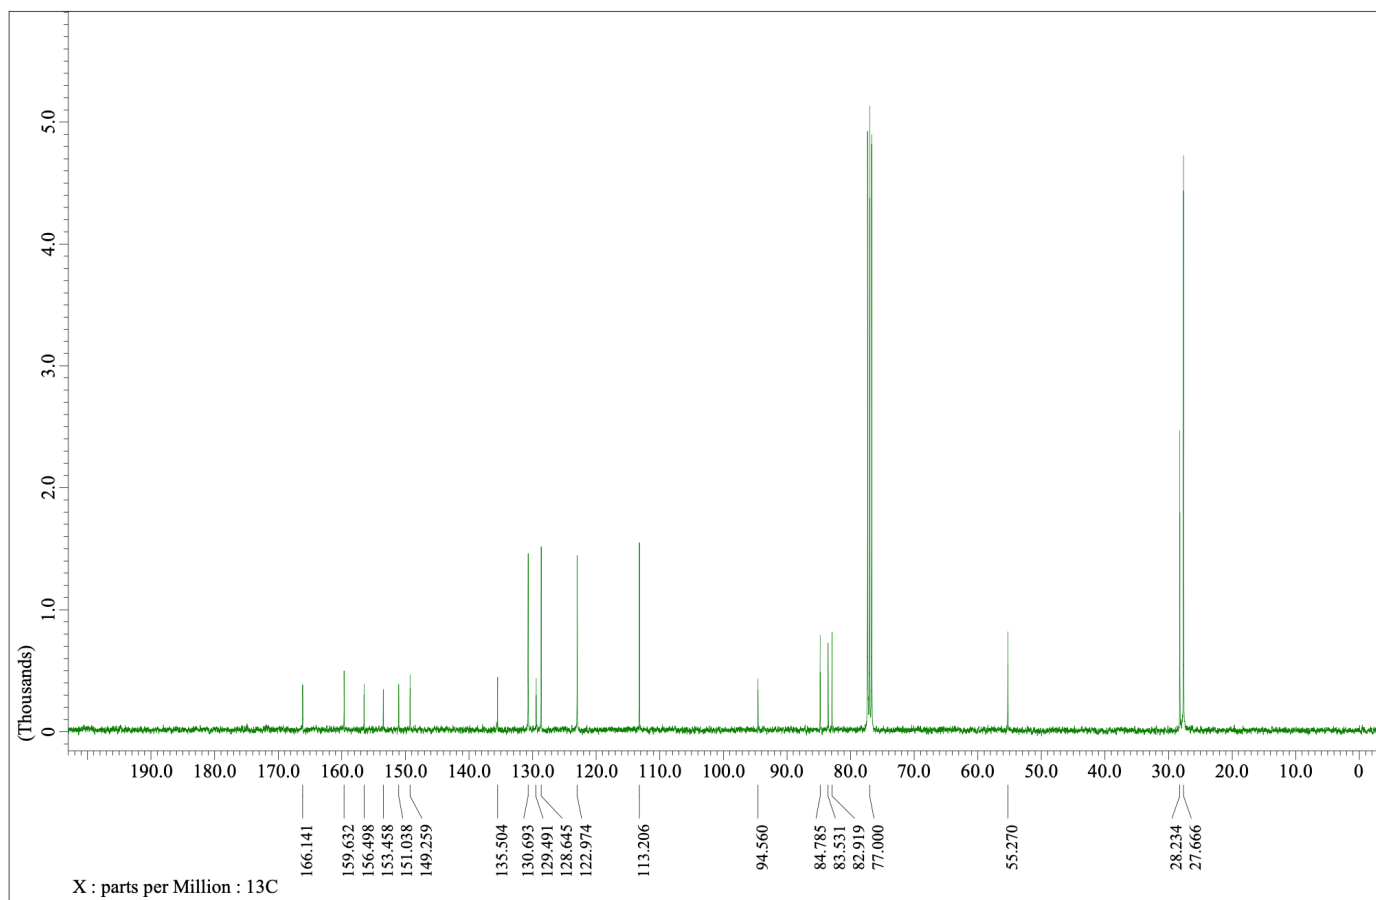

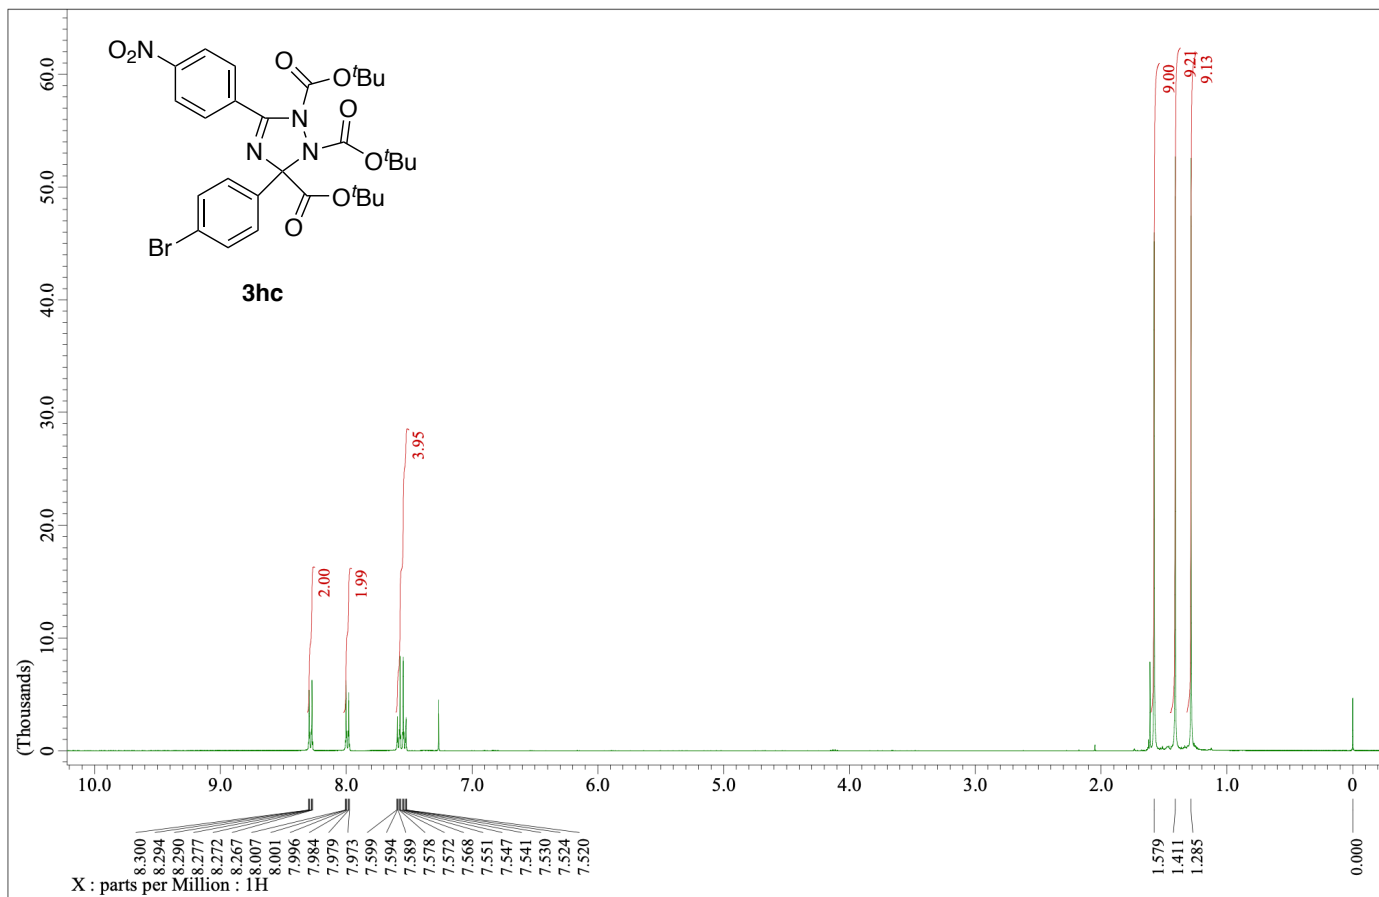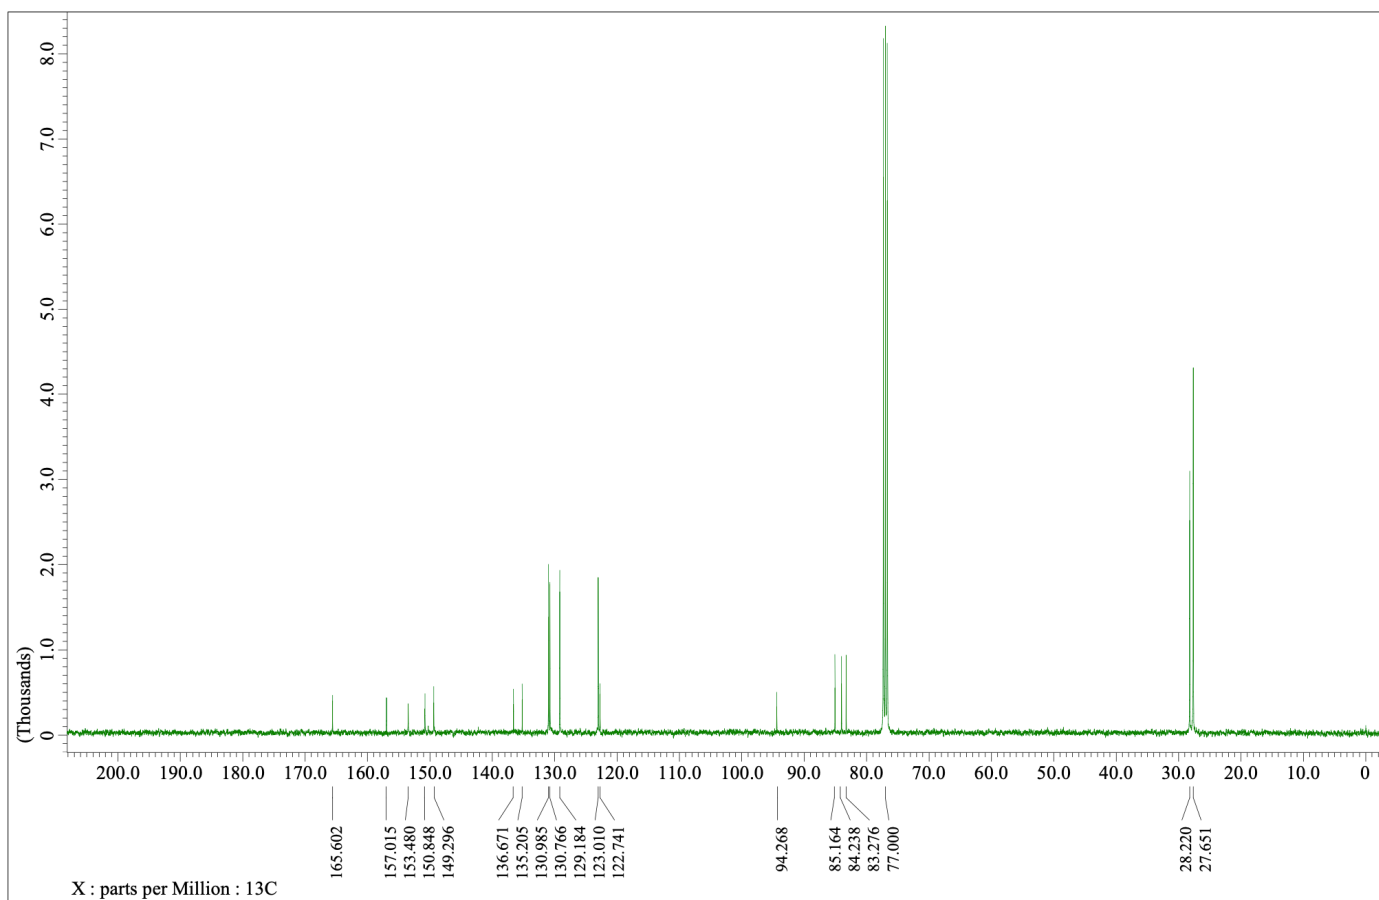

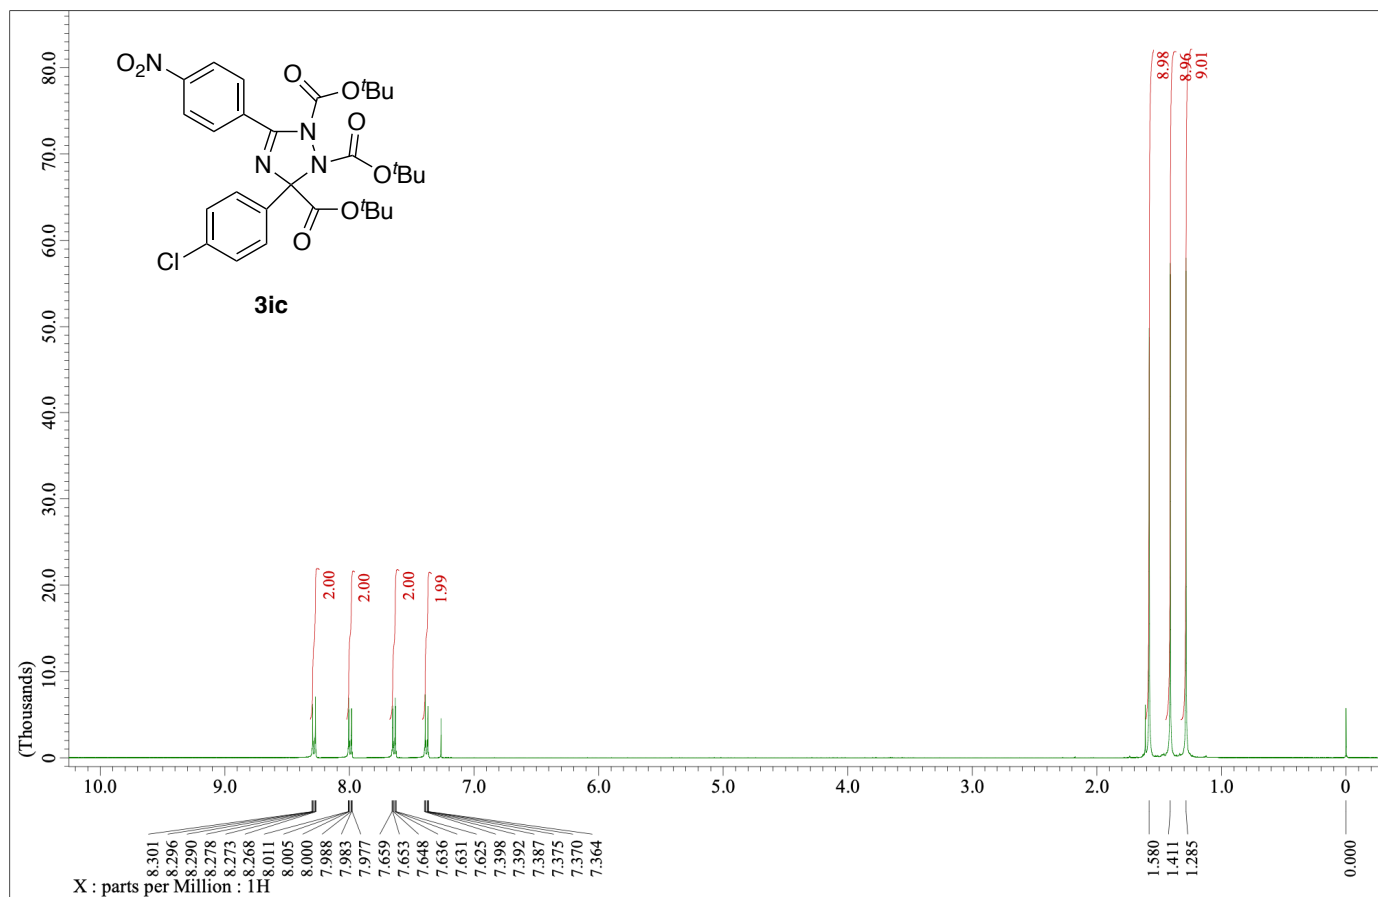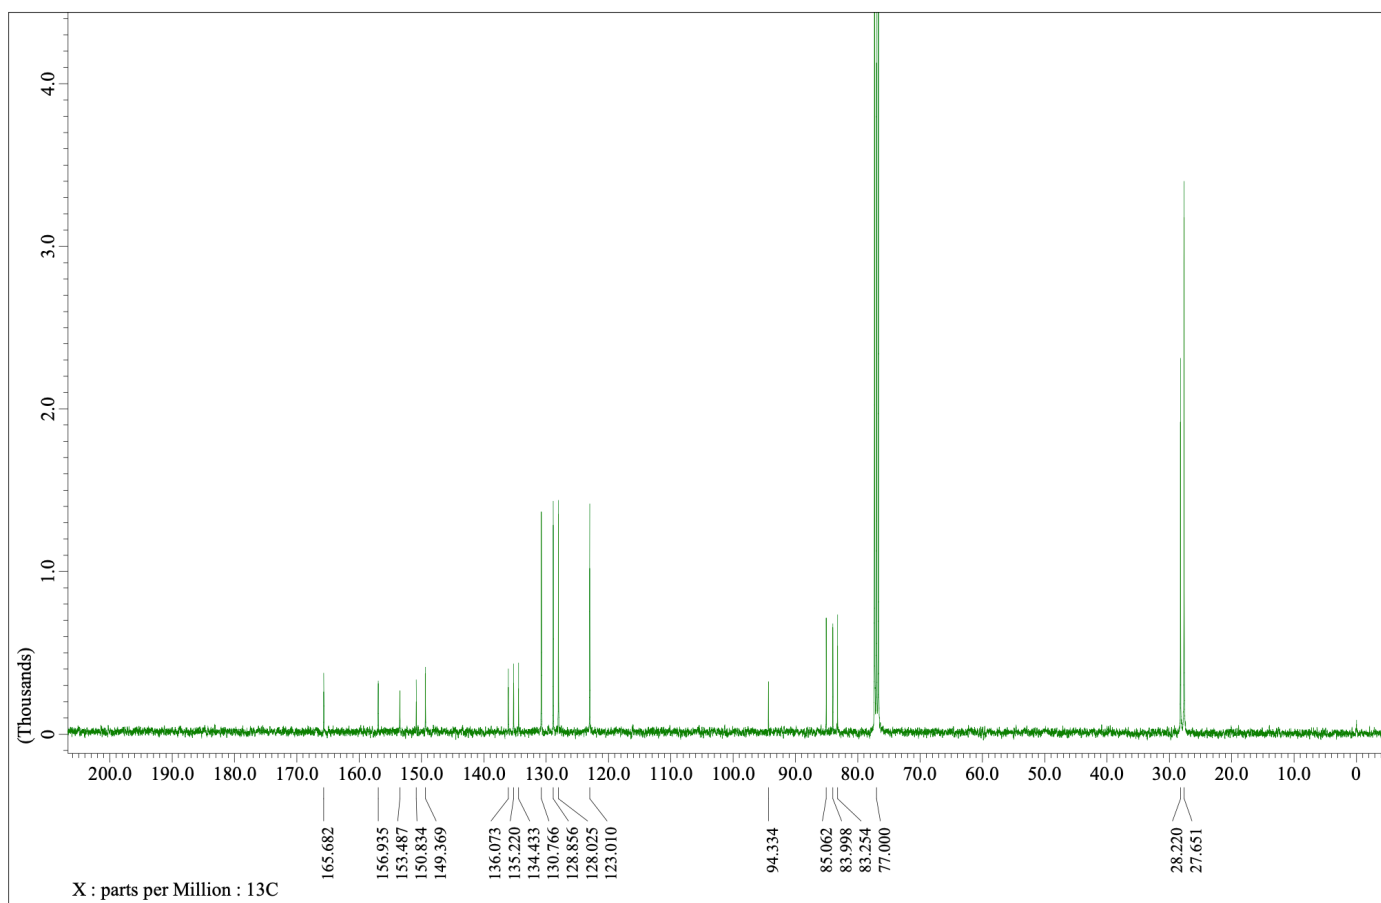

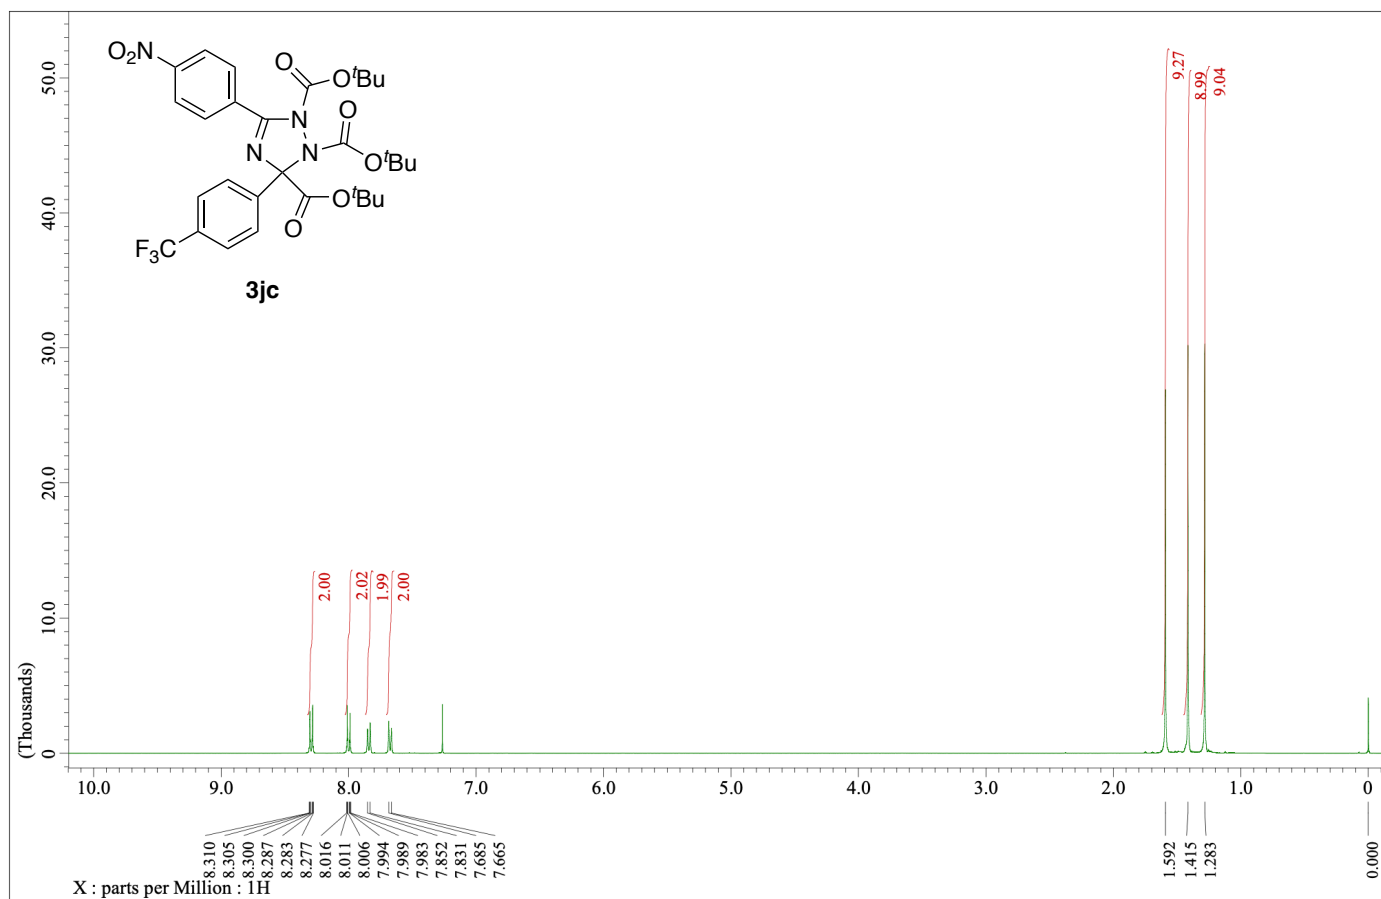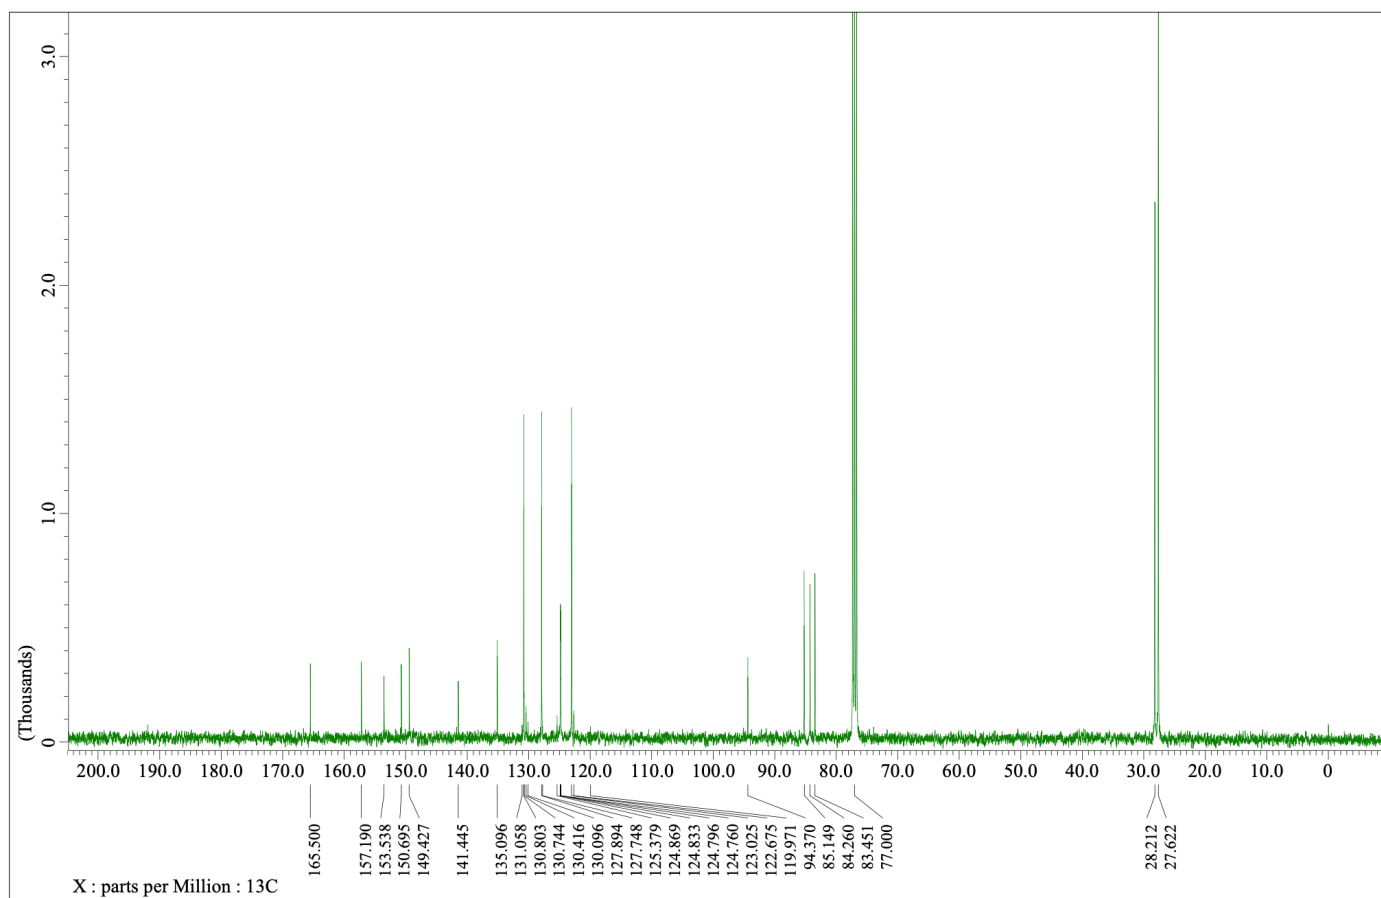

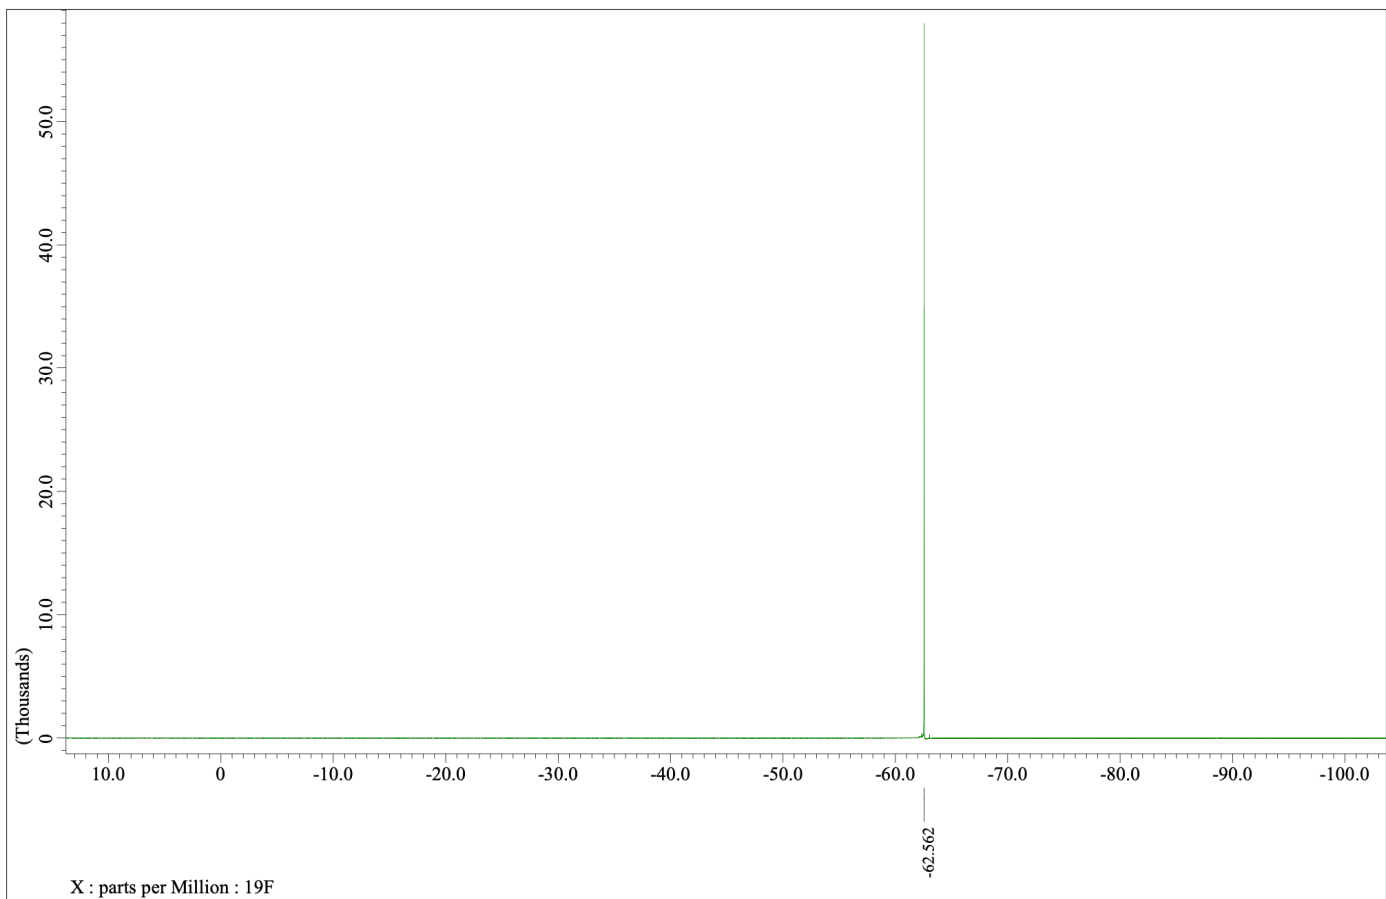

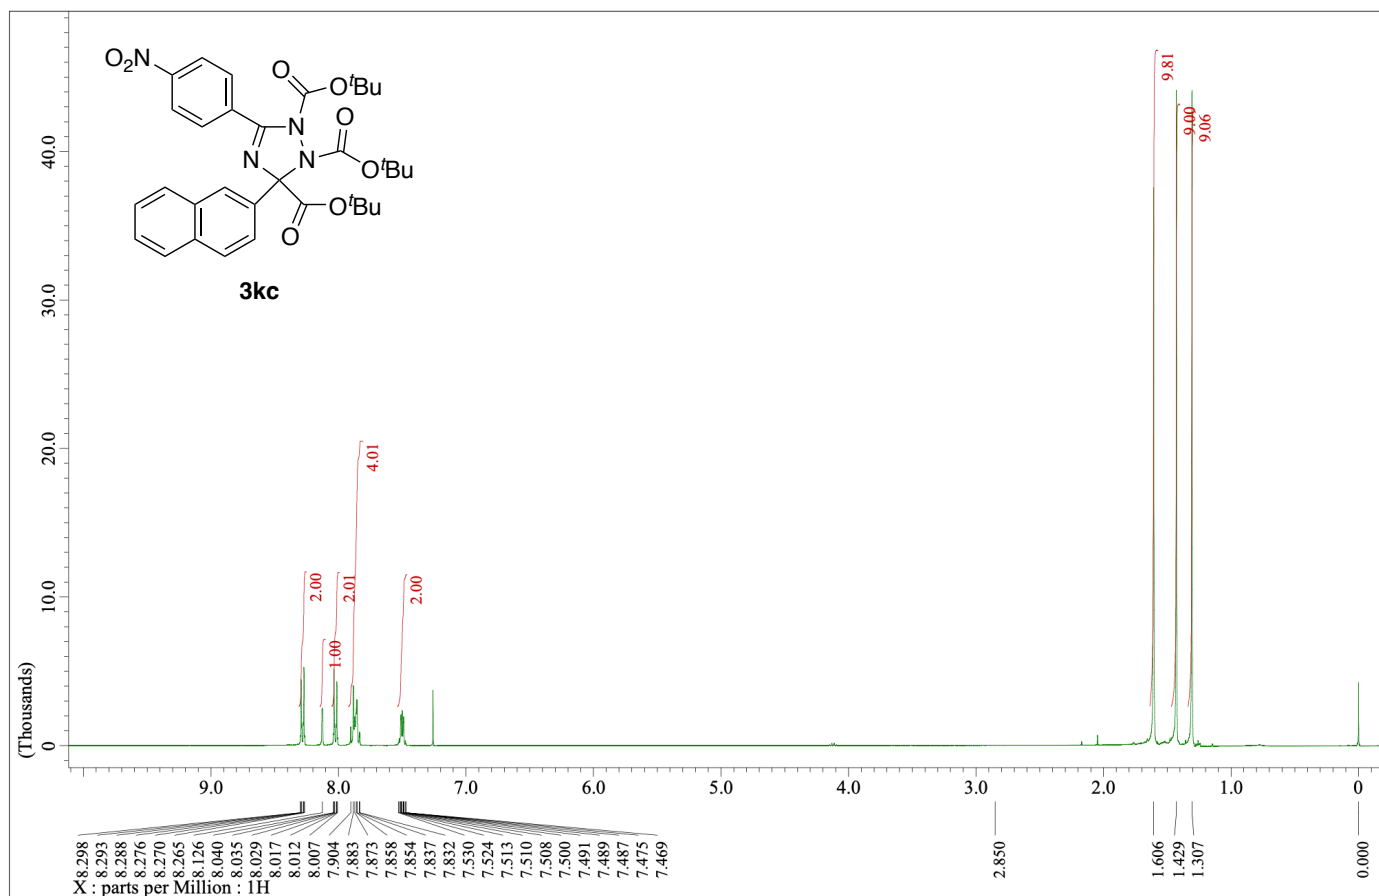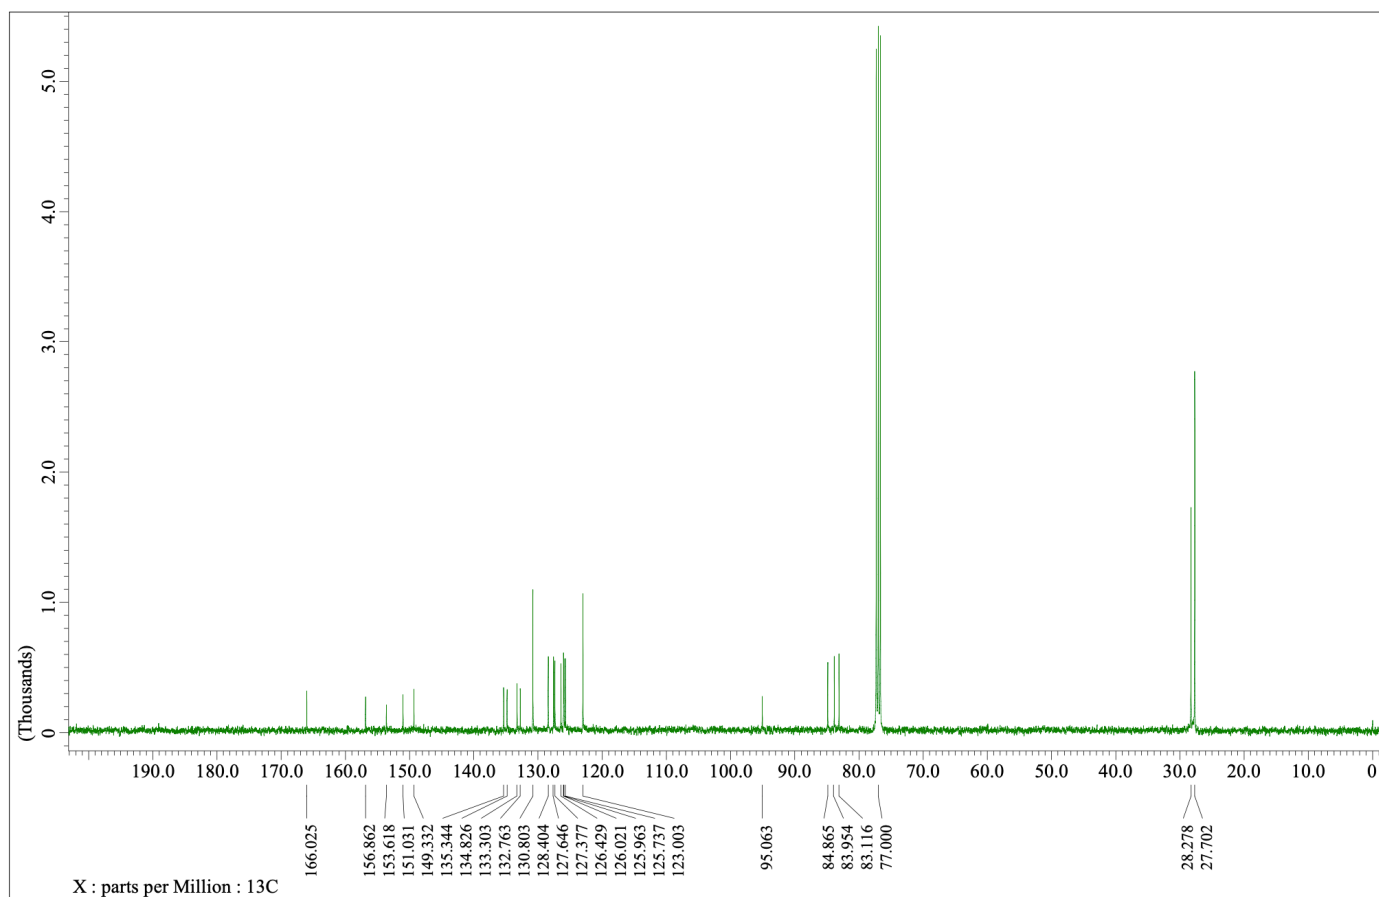

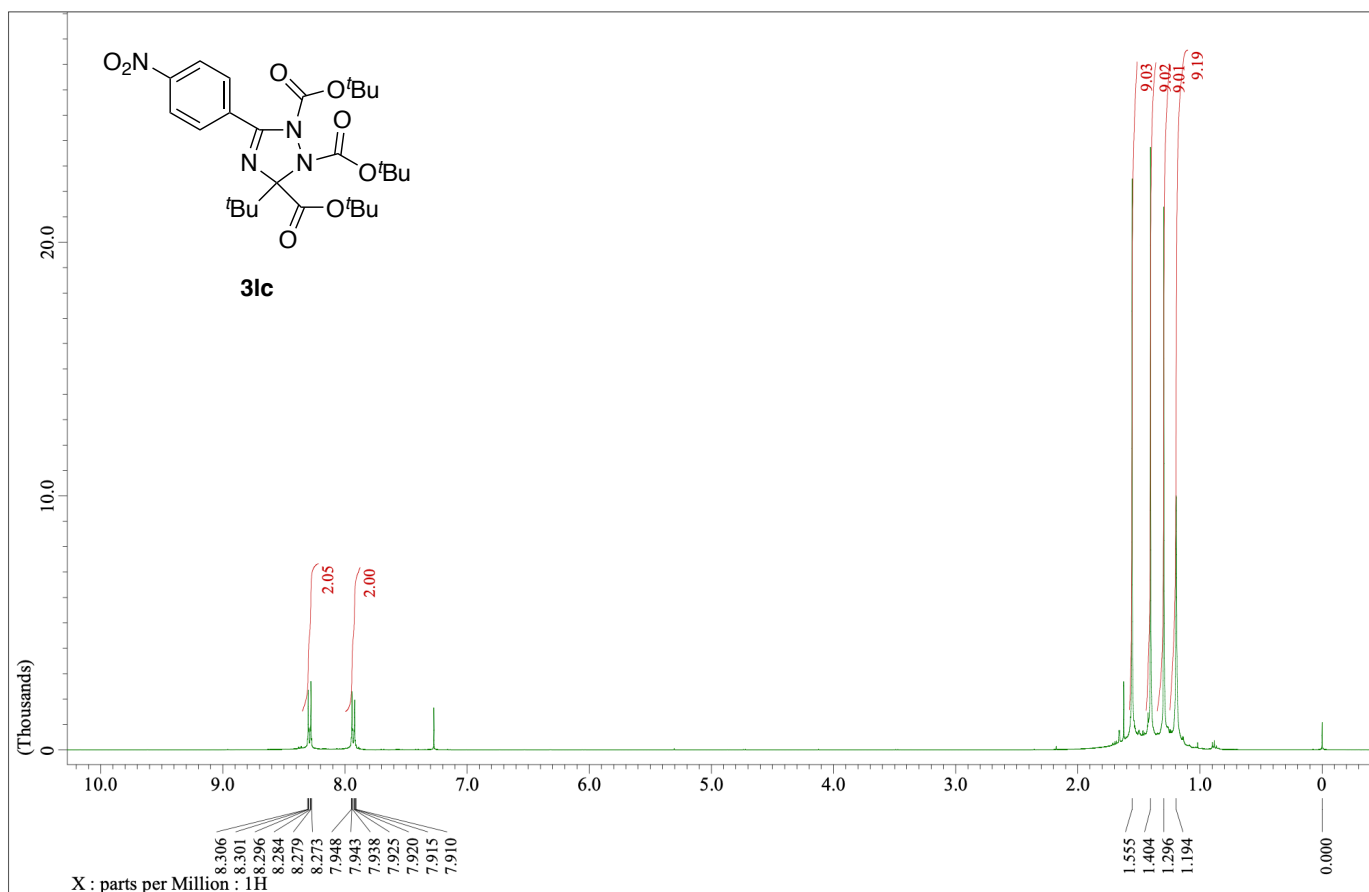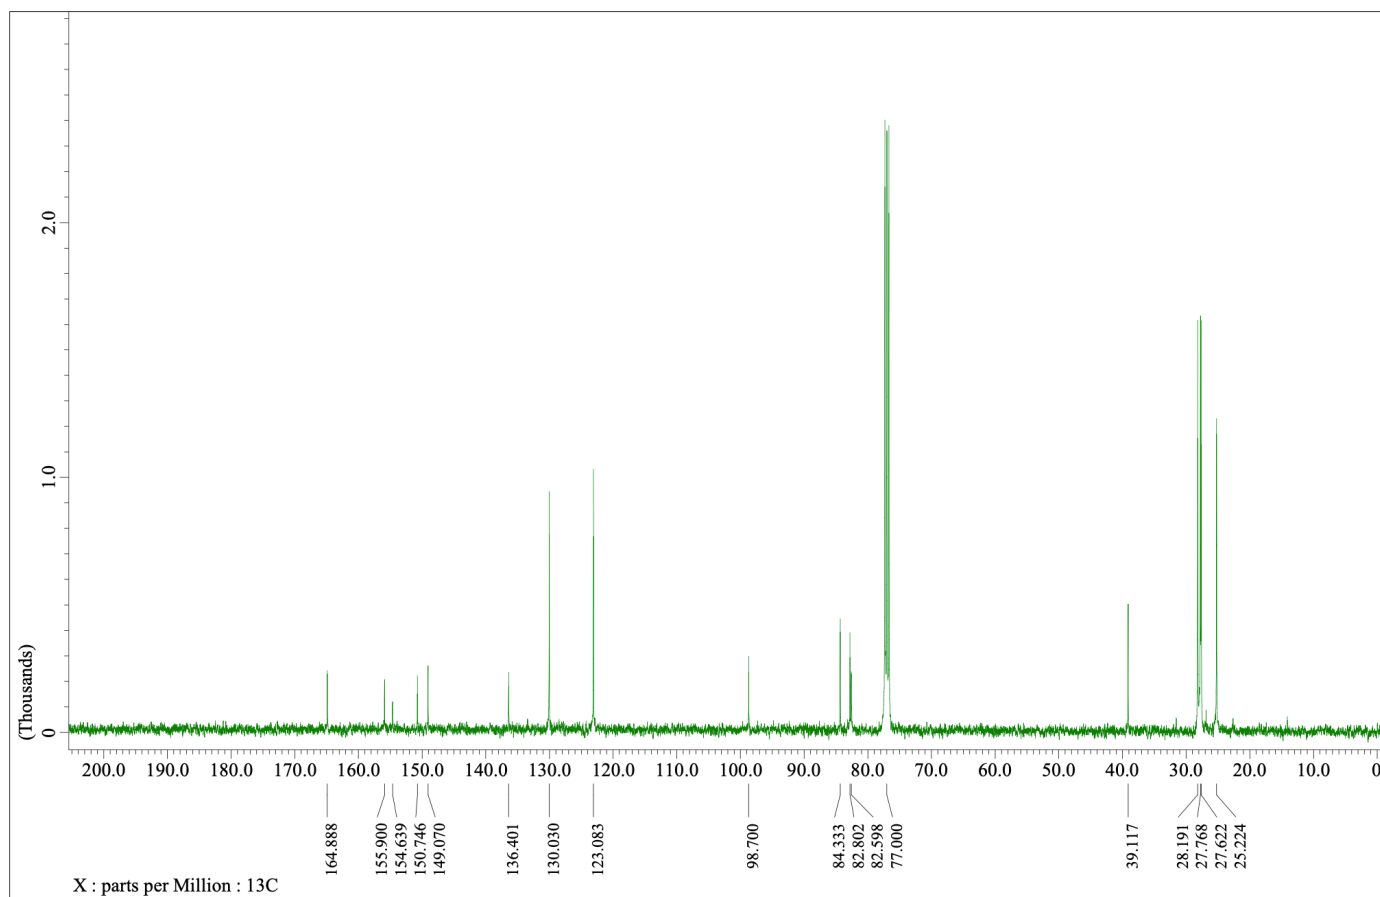

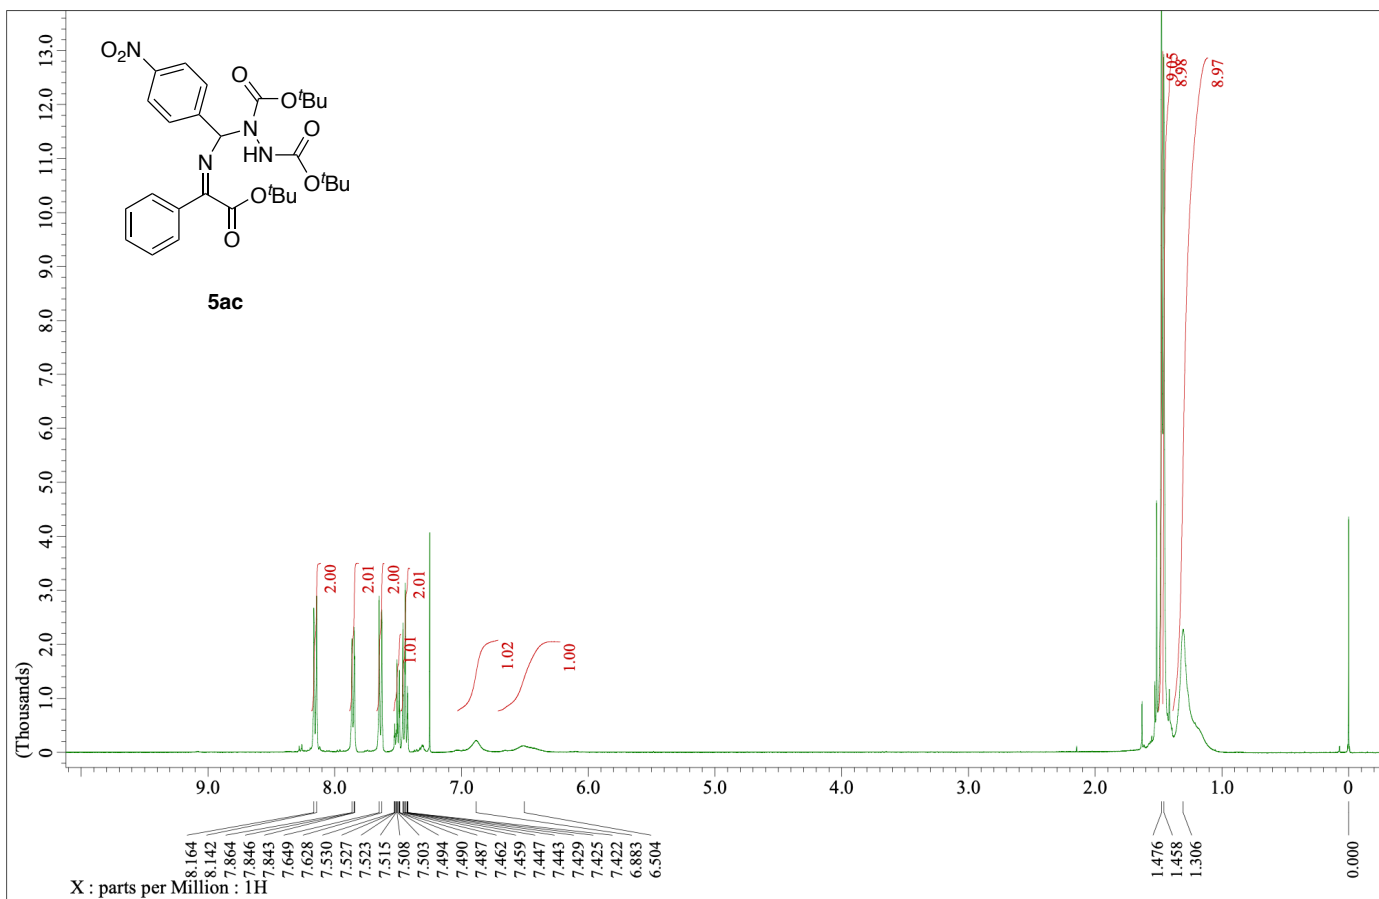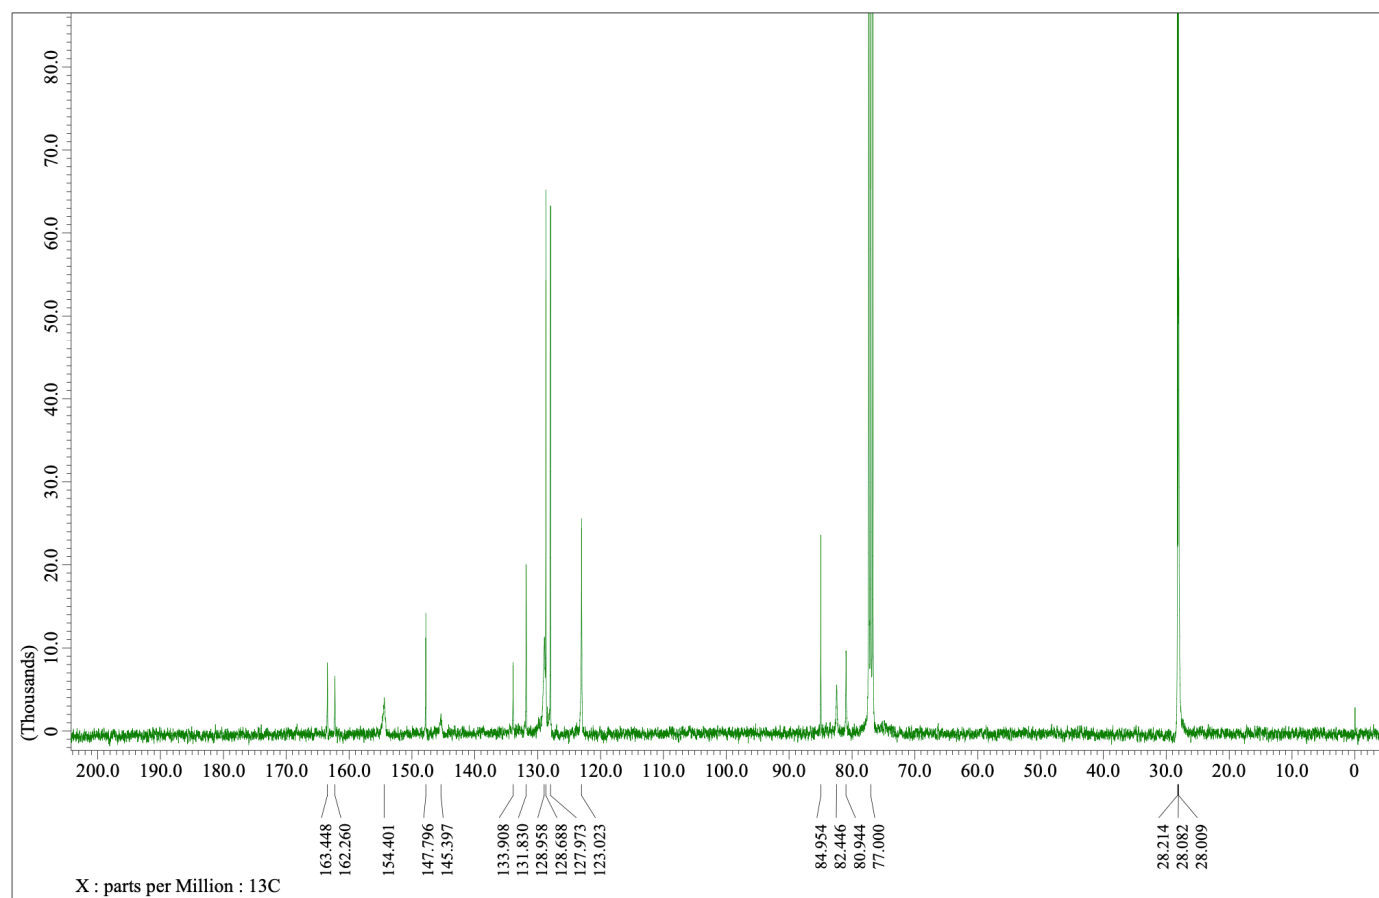



• 2D-NMR (HMBC)

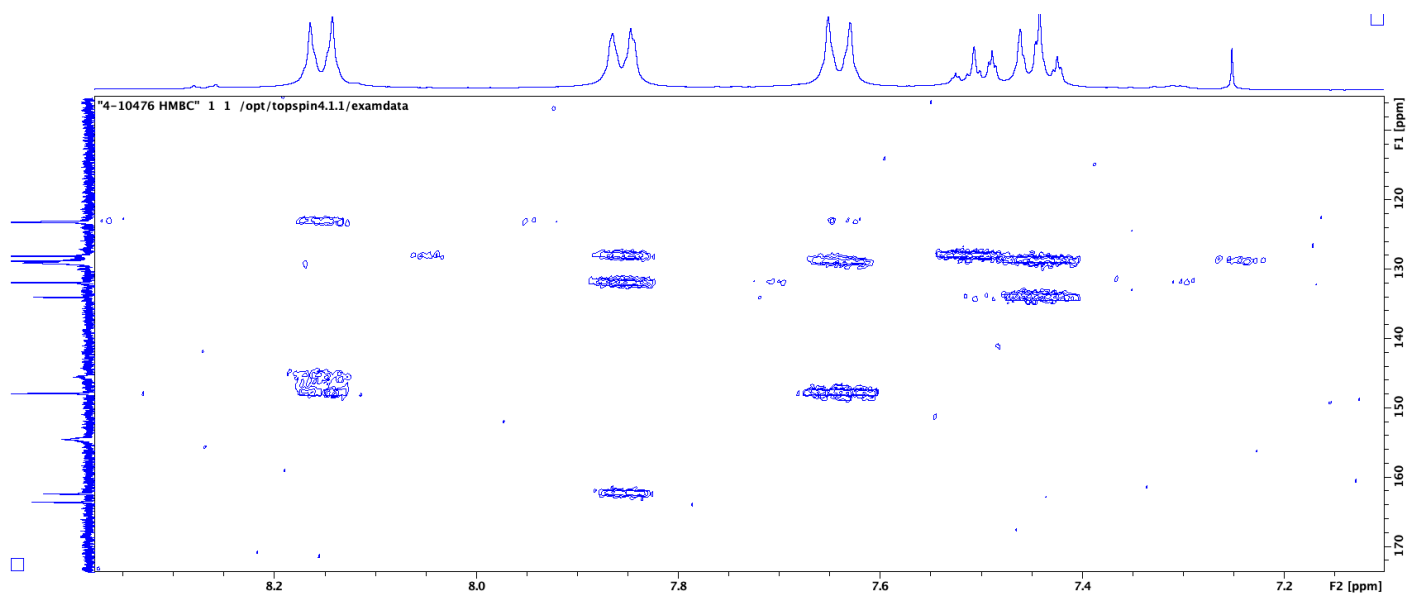

**3ac** (racemate)

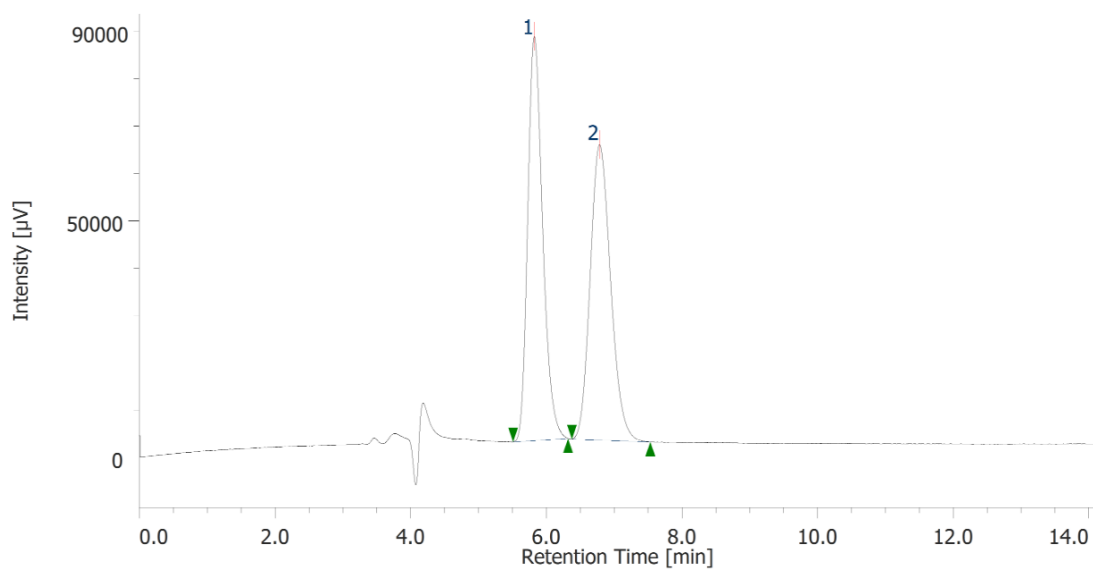

| # | Peak Name | CH | tR [min] | Area [μV·sec] | Height [μV] | Area% | Height% |
|---|-----------|----|----------|---------------|-------------|-------|---------|
| 1 | Unknown   | 10 | 5.822    | 1307127       | 85461       | 50.0  | 57.8    |
| 2 | Unknown   | 10 | 6.783    | 1306558       | 62426       | 50.0  | 42.2    |

### 3ac (Scheme 6, starting from 1a)

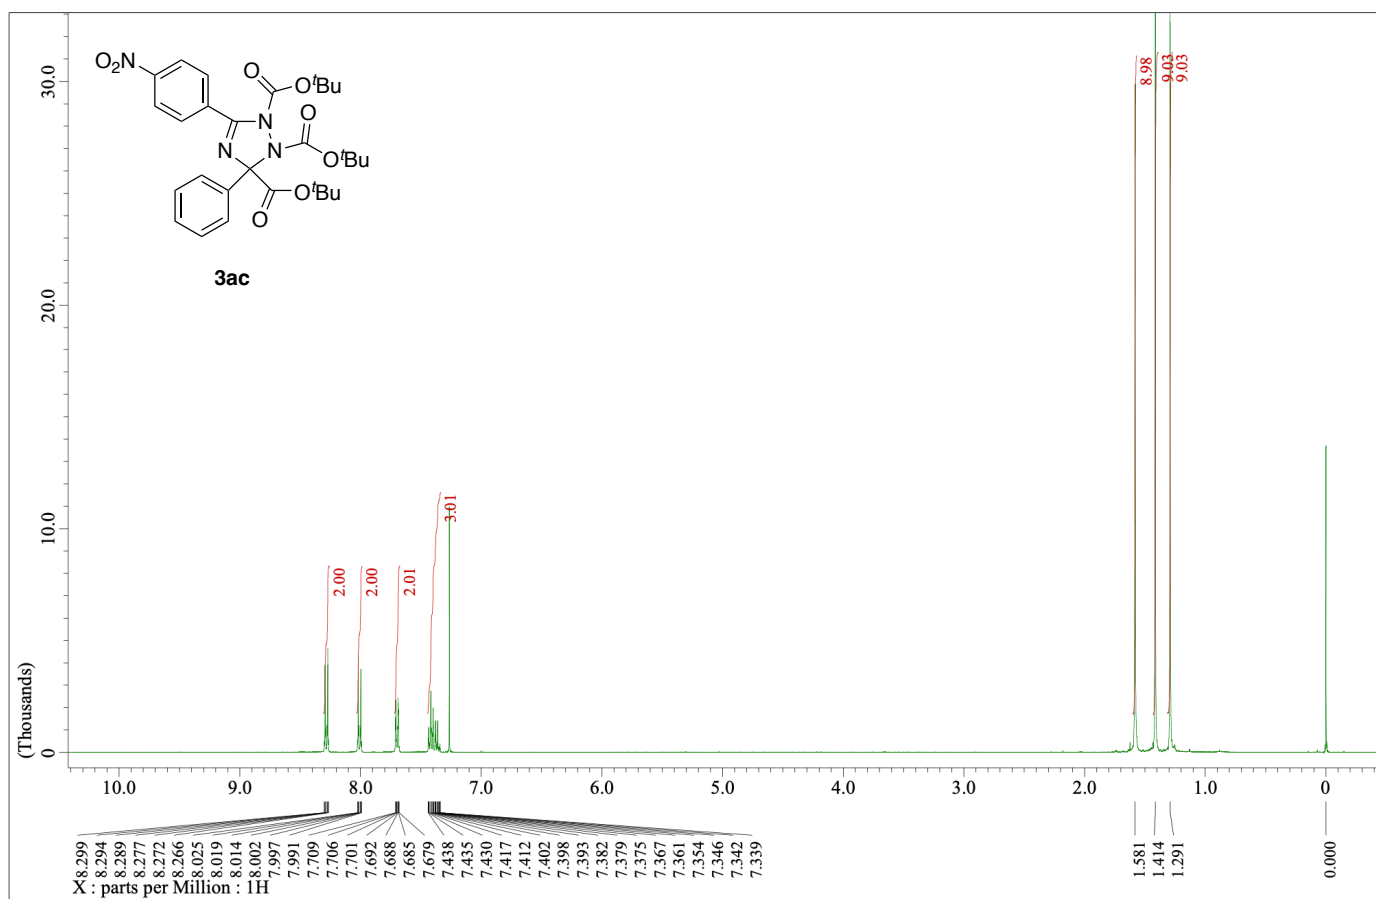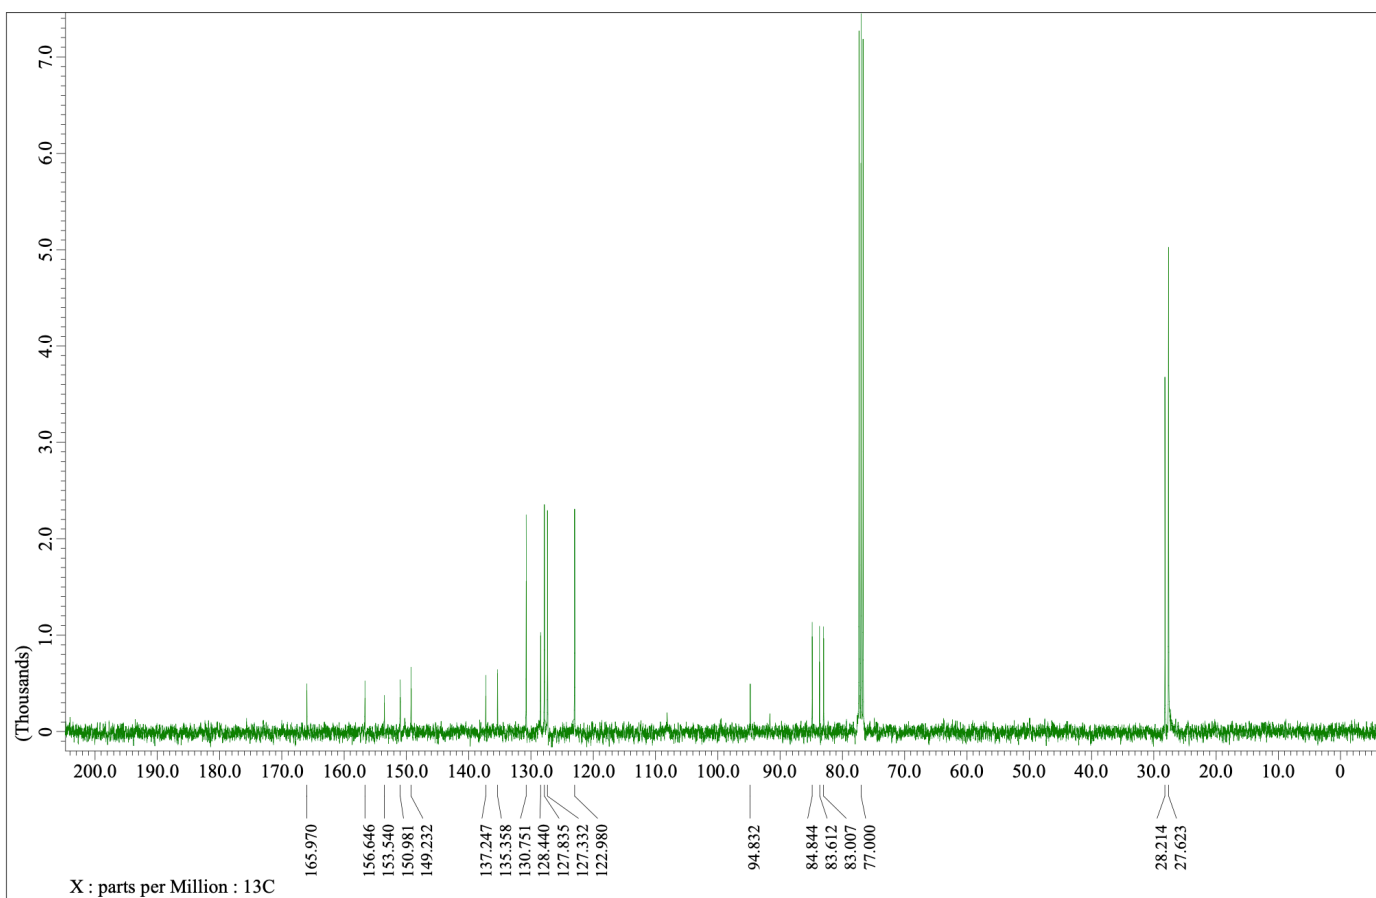

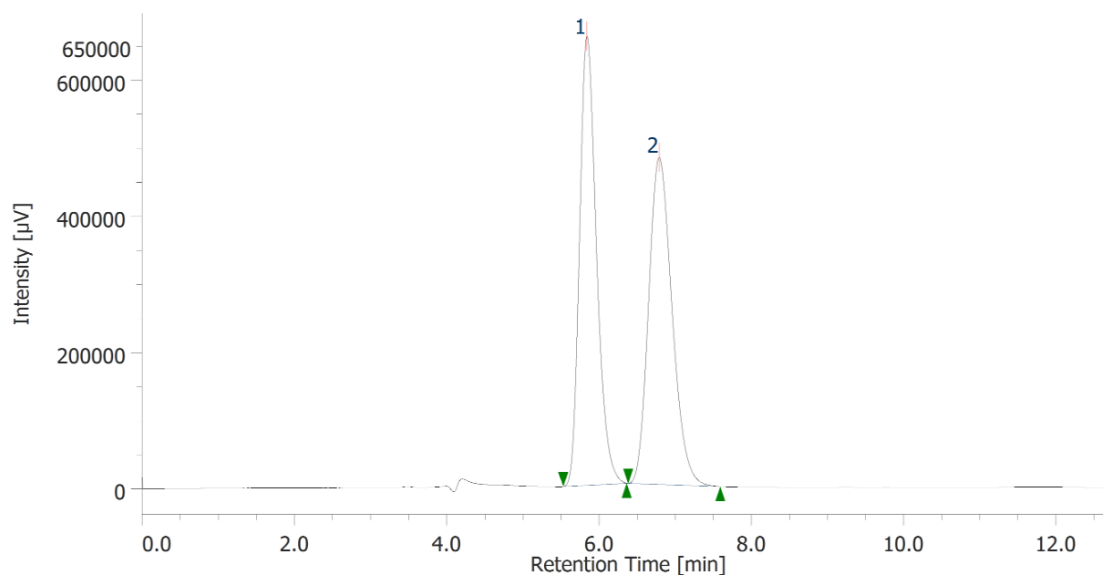

| # | Peak Name | CH | tR [min] | Area [μV·sec] | Height [μV] | Area% | Height% |
|---|-----------|----|----------|---------------|-------------|-------|---------|
| 1 | Unknown   | 11 | 5.838    | 10192332      | 659591      | 49.9  | 57.9    |
| 2 | Unknown   | 11 | 6.788    | 10241875      | 480056      | 50.1  | 42.1    |

### 3ac (Scheme 7, starting from 1a')

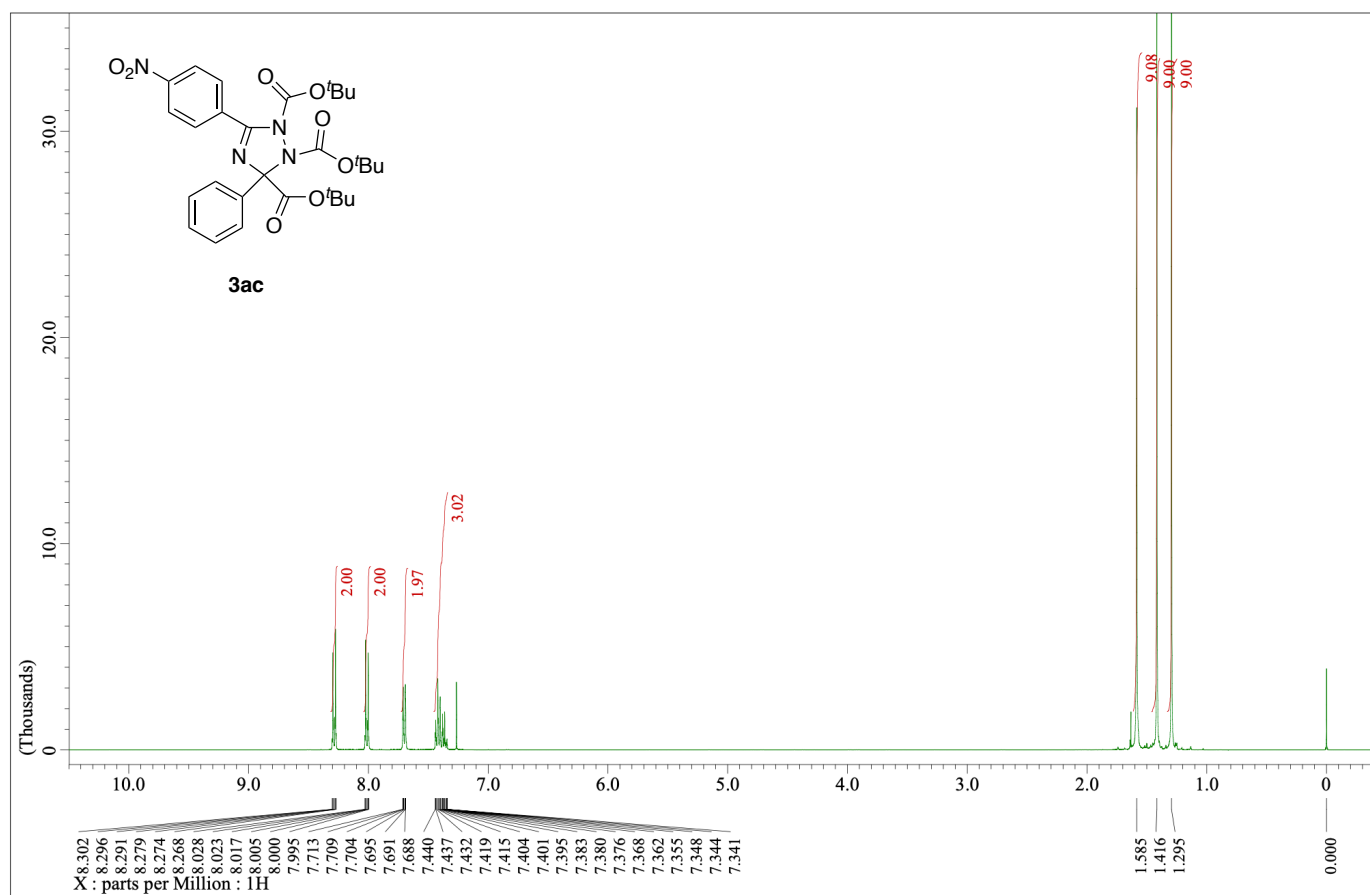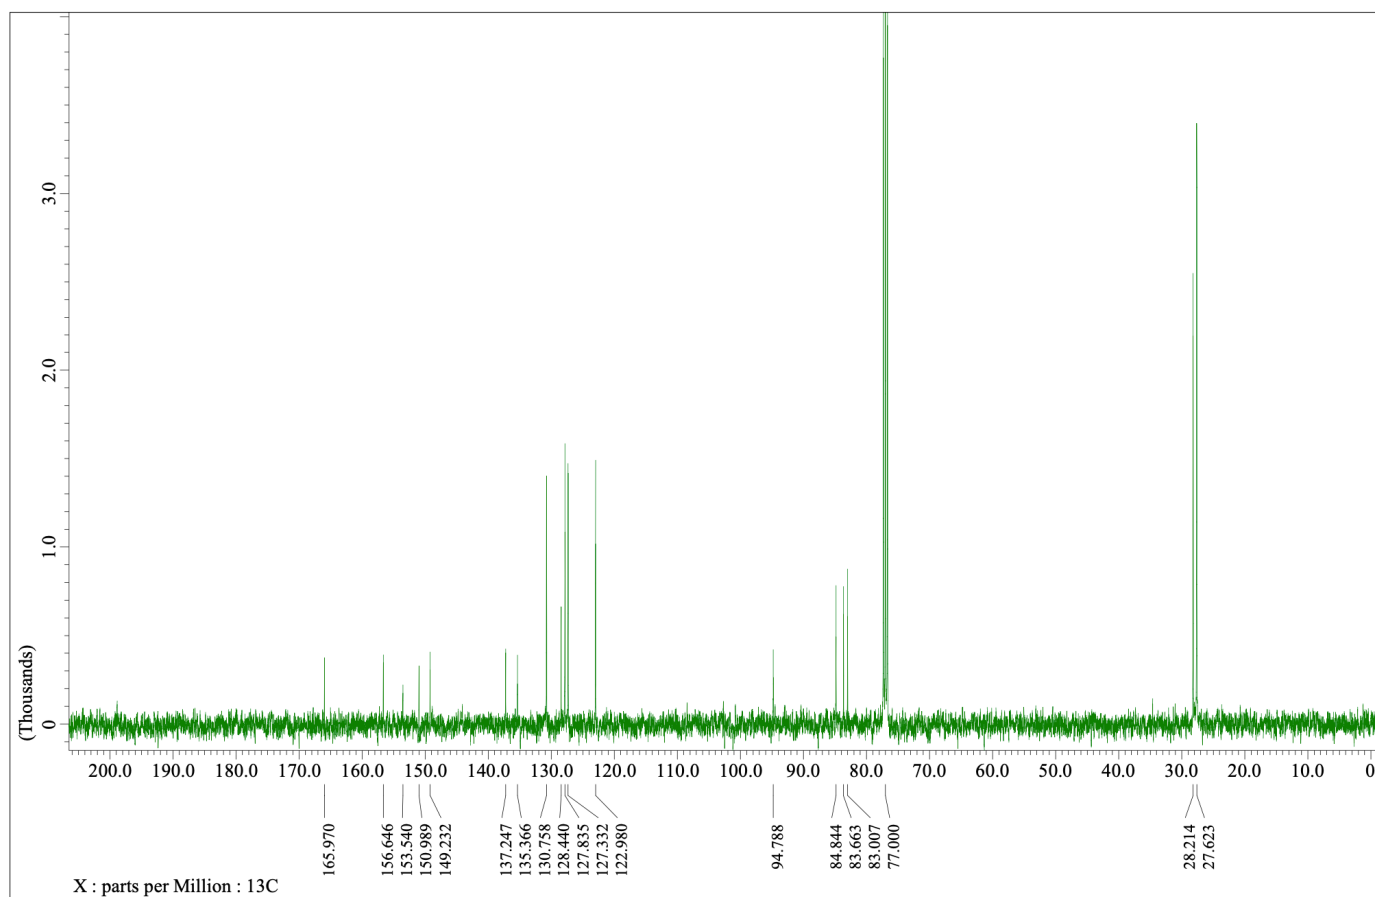

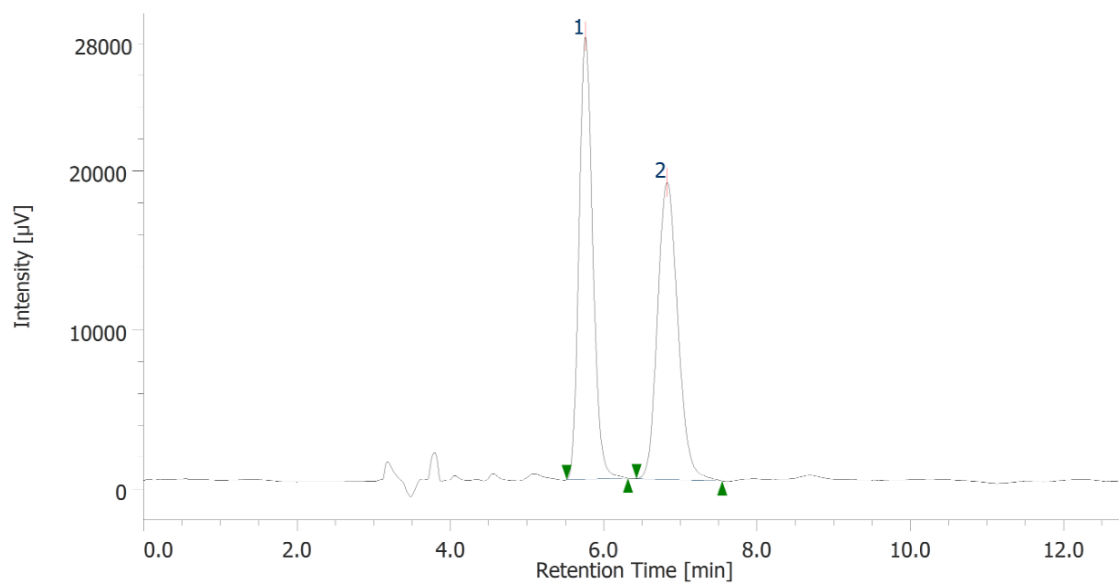

| # | Peak Name | CH | tR [min] | Area [μV·sec] | Height [μV] | Area% | Height% |
|---|-----------|----|----------|---------------|-------------|-------|---------|
| 1 | Unknown   | 3  | 5.758    | 345340        | 27834       | 50.1  | 59.9    |
| 2 | Unknown   | 3  | 6.825    | 343465        | 18670       | 49.9  | 40.1    |
